# Supplementary material
Source: PubMed Central journal article supplement (PMC3700271)

## Supplemental materials

**Figure S1 MS and MS/MS spectra of the 27 identified protein**

This includes the MALDI-TOF spectrum and confirming MALDI-TOF/TOF spectrum of 27 differentially expressed protein spots in RV-infected Neuroblastoma cells. The MALDI-TOF spectra were given by annotating with masses (blue), and their peptide assignments were tabulated with masses. In tables, the peptides with statistically significant ion score (confidence interval, C.I% >95%) (red and bold) or ion score above 21 (green) was considered to be confidently identified by MALDI-TOF/TOF, and their MS/MS spectra were shown with masses detected and fragment

**Spot No.0442**                      **gi|70724981**  
 phosphoprotein [rabies virus]

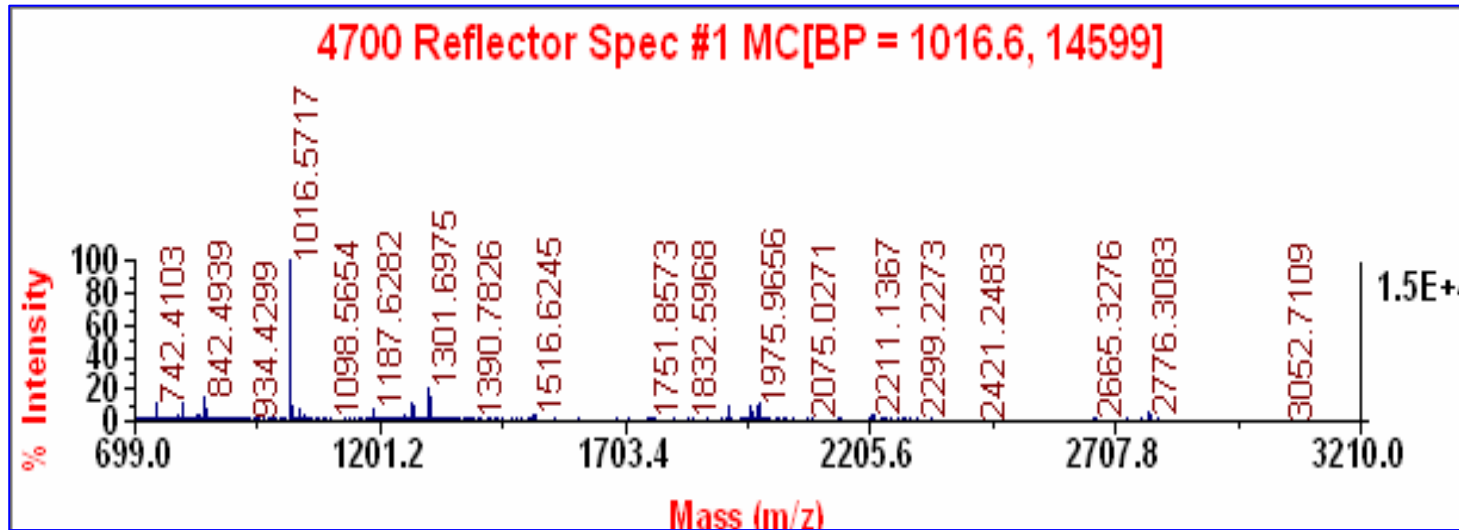

| Calc. Mass | Obsrv.Mass      | ± da    | ± ppm | Start | Seq. End | Seq. Sequence | Ion Score | C. I. % |
|------------|-----------------|---------|-------|-------|----------|---------------|-----------|---------|
| 742.4206   | <b>742.4103</b> | -0.0103 | -14   | 243   | 249      | NVPGVTR       |           |         |
| 750.374    | 750.3625        | -0.0115 | -15   | 145   | 151      | STQTTGR       |           |         |

|                  |                  |                |            |           |                                    |            |               |
|------------------|------------------|----------------|------------|-----------|------------------------------------|------------|---------------|
| 797.4304         | 797.4183         | -0.0121        | -15        | 213       | 218 YKFPSR                         |            |               |
| 870.4468         | 870.5228         | 0.076          | 87         | 110       | 116 SGERFFK                        |            |               |
| <b>1016.5887</b> | <b>1016.5715</b> | <b>-0.0172</b> | <b>-17</b> | <b>4</b>  | <b>12 IFVNPSAIR</b>                | <b>54</b>  | <b>99.143</b> |
| <b>1016.5887</b> | <b>1016.5715</b> | <b>-0.0172</b> | <b>-17</b> | <b>4</b>  | <b>12 IFVNPSAIR</b>                |            |               |
| 1016.5887        | 1016.5715        | -0.0172        | -17        | 4         | 12 IFVNPSAIR                       |            |               |
| 1034.5299        | 1034.5298        | -0.0001        | 0          | 63        | 71 LSNLGEMVR                       |            |               |
| 1190.678         | 1190.6438        | -0.0342        | -29        | 273       | 282 KFQLIVEADK                     |            |               |
| 1296.6027        | 1296.5942        | -0.0085        | -7         | 140       | 151 SSEDKSTQTTGR                   |            |               |
| 1349.673         | 1349.67          | -0.003         | -2         | 283       | 293 LSKIMQDDLDR                    |            |               |
| 1390.7941        | 1390.7822        | -0.0119        | -9         | 274       | 285 FQLIVEADKLSK                   |            |               |
| 1504.7788        | 1504.801         | 0.0222         | 15         | 63        | 76 LSNLGEMVRVGEK                   |            |               |
| <b>1959.9691</b> | <b>1959.9473</b> | <b>-0.0218</b> | <b>-11</b> | <b>13</b> | <b>30 AGLADLEMAEETVDLINR</b>       | <b>105</b> | <b>100</b>    |
| 1959.9691        | 1959.9473        | -0.0218        | -11        | 13        | 30 AGLADLEMAEETVDLINR              |            |               |
| 1959.9691        | 1959.9473        | -0.0218        | -11        | 13        | 30 AGLADLEMAEETVDLINR              |            |               |
| <b>1975.9641</b> | <b>1975.9653</b> | <b>0.0012</b>  | <b>1</b>   | <b>13</b> | <b>30 AGLADLEMAEETVDLINR</b>       | <b>47</b>  | <b>96.126</b> |
| 1975.9641        | 1975.9653        | 0.0012         | 1          | 13        | 30 AGLADLEMAEETVDLINR              |            |               |
| 1975.9641        | 1975.9653        | 0.0012         | 1          | 13        | 30 AGLADLEMAEETVDLINR              |            |               |
| 2030.9963        | 2030.9792        | -0.0171        | -8         | 55        | 71 QFHLDDEKLSNLGEMVR               |            |               |
| 2046.9913        | 2047.0293        | 0.038          | 19         | 55        | 71 QFHLDDEKLSNLGEMVR               |            |               |
| <b>2776.2842</b> | <b>2776.3069</b> | <b>0.0227</b>  | <b>8</b>   | <b>31</b> | <b>54 NIEDNQAHLQGEPIEVDNLPEDMF</b> | <b>64</b>  | <b>99.925</b> |
| 2776.2842        | 2776.3069        | 0.0227         | 8          | 31        | 54 NIEDNQAHLQGEPIEVDNLPEDMR        |            |               |
| 2776.2842        | 2776.3069        | 0.0227         | 8          | 31        | 54 NIEDNQAHLQGEPIEVDNLPEDMR        |            |               |

### MS/MS Fragmentation of IFVNPSAIR (1016.5715,1+)

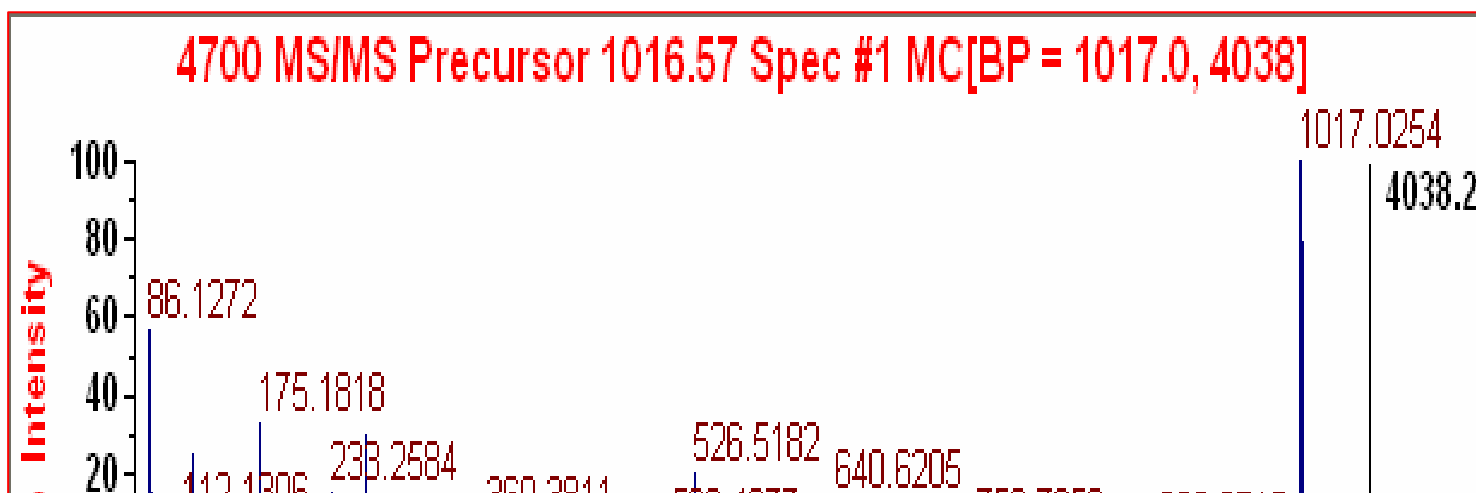

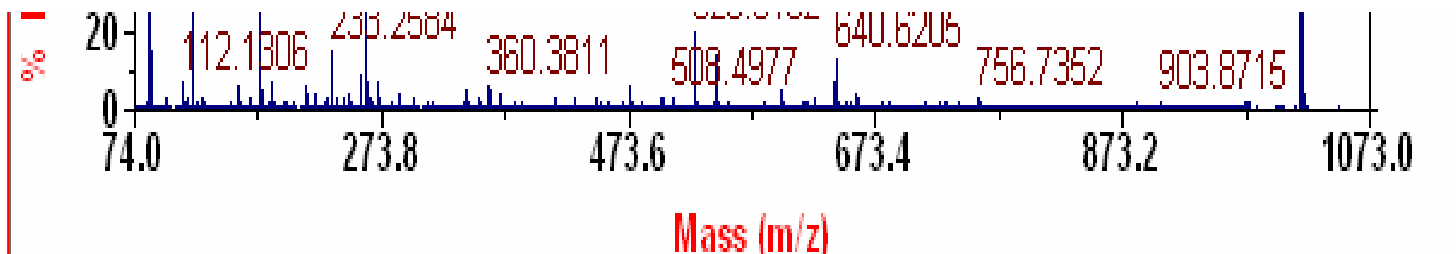

MS/MS Fragmentation of **AGLADLEMAEETVDLINR(1959.9473,1+)**

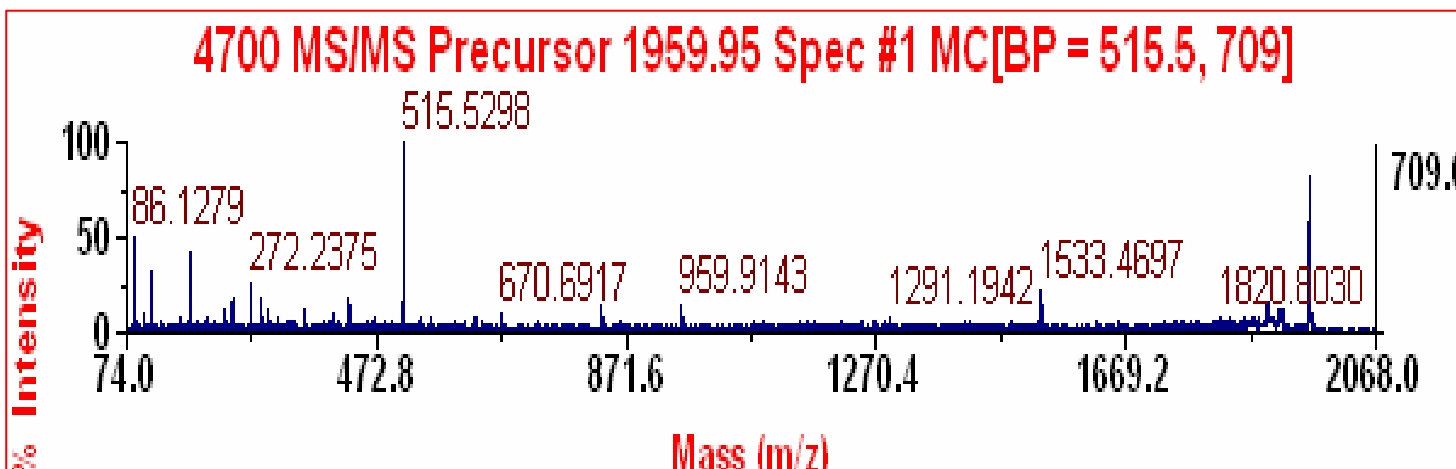

MS/MS Fragmentation of **AGLADLEMAEETVDLINR (1975.9653,1+)**

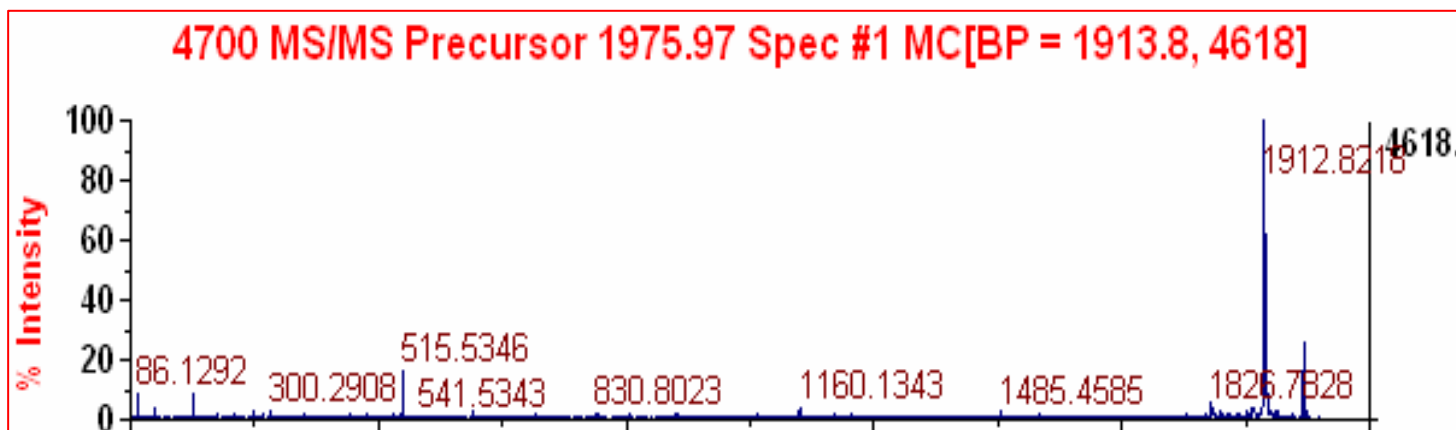

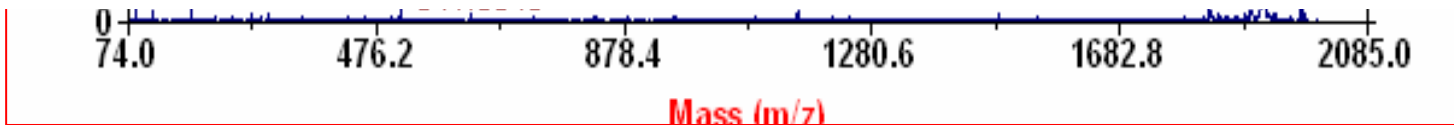

MS/MS Fragmentation of **NIEDNQAHLQGEPIEVDNLPEDMR(2776.3069,1+)**

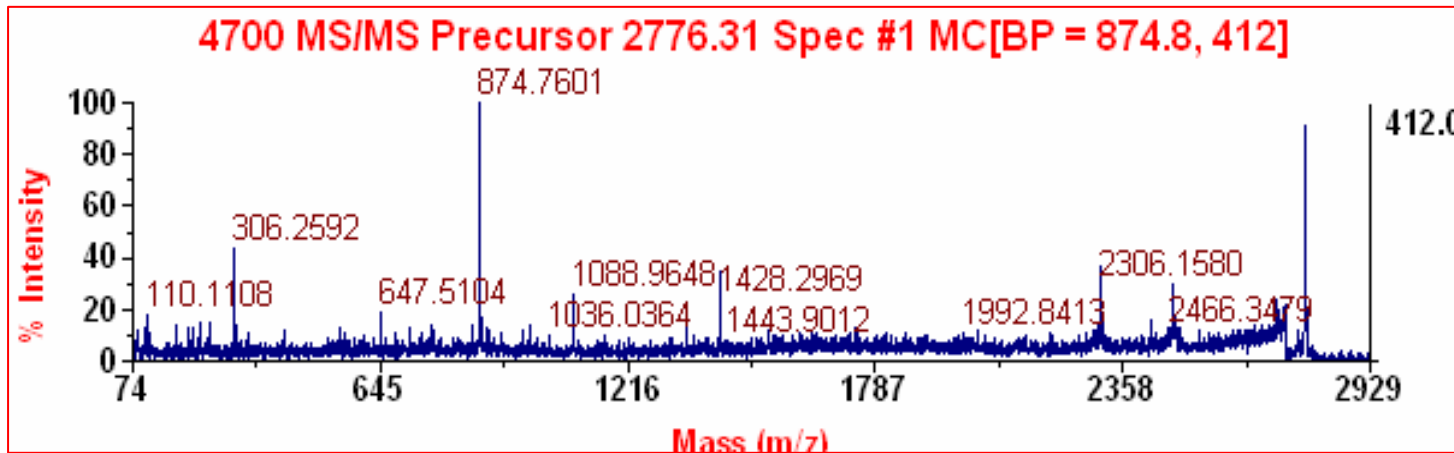

Spot No.3135      gi|9627200

M2 protein [rabies virus]

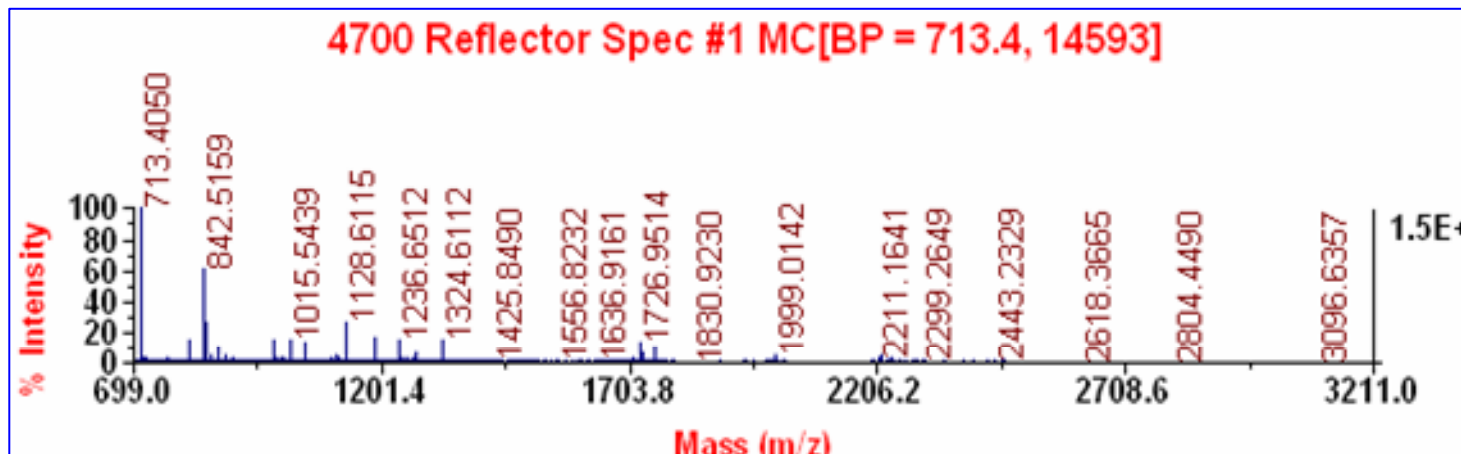

| Calc. Mass | Obsrv.Mass | ± da   | ± ppm | Start | Seq. | End Seq.            | Sequence | Ion Score | C. I. % |
|------------|------------|--------|-------|-------|------|---------------------|----------|-----------|---------|
| 1236.6372  | 1236.6494  | 0.0122 | 10    | 119   | 128  | TLIFQWADSR          |          | 55        | 99.684  |
| 1236.6372  | 1236.6494  | 0.0122 | 10    | 119   | 128  | TLIFQWADSR          |          |           |         |
| 1324.5917  | 1324.6112  | 0.0195 | 15    | 78    | 88   | SFDEIYSGNHR         |          | 30        | 9.311   |
| 1324.5917  | 1324.6112  | 0.0195 | 15    | 78    | 88   | SFDEIYSGNHR         |          |           |         |
| 1349.6565  | 1349.7142  | 0.0577 | 43    | 166   | 176  | GRIWCINMNSR         |          |           |         |
| 1392.7383  | 1392.7472  | 0.0089 | 6     | 118   | 128  | RTLIFQWADSR         |          |           |         |
| 1636.7748  | 1636.9153  | 0.1405 | 86    | 177   | 190  | AGQLWSDMSLQTQR      |          |           |         |
| 2225.0139  | 2225.1982  | 0.1843 | 83    | 177   | 195  | AGQLWSDMSLQTQRSEEDK |          |           |         |

### MS/MS Fragmentation of TLIFQWADSR (1236.6494, 1+)

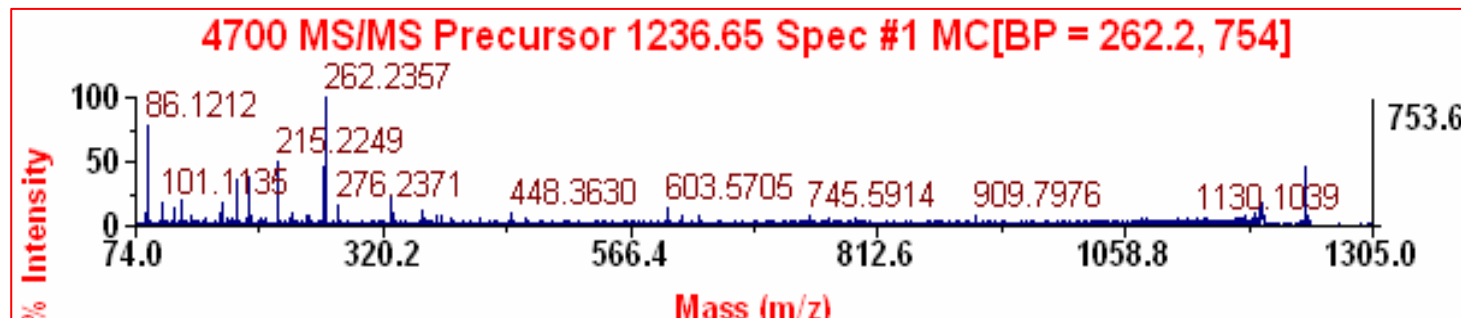

### Spot No.5679 gi|18478987

Nucleoprotein [rabies virus]

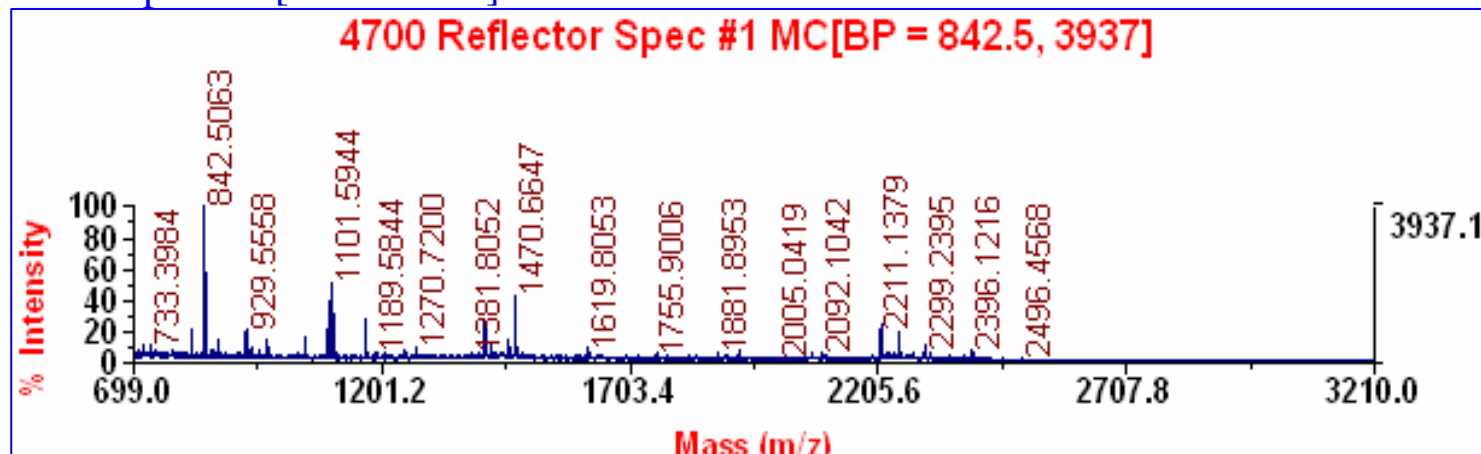

| Calc. Mass       | Obsrv.Mass       | ± da           | ± ppm      | Start Seq. | End Seq.   | Sequence                | Ion Score | C. I. %       |
|------------------|------------------|----------------|------------|------------|------------|-------------------------|-----------|---------------|
| 778.3698         | 778.3656         | -0.0042        | -5         | 409        | 415        | IMMNGGR                 |           |               |
| 794.3647         | 794.3458         | -0.0189        | -24        | 409        | 415        | IMMNGGR                 |           |               |
| 815.4733         | 815.4678         | -0.0055        | -7         | 248        | 254        | QINLTAR                 |           |               |
| 841.4202         | 841.4213         | 0.0011         | 1          | 359        | 364        | FFRDEK                  |           |               |
| 922.4628         | 922.4625         | -0.0003        | 0          | 401        | 408        | SPEAVYTR                |           |               |
| 936.4421         | 936.4403         | -0.0018        | -2         | 264        | 270        | NFEEIIR                 |           |               |
| 1092.5432        | 1092.5344        | -0.0088        | -8         | 264        | 271        | NFEEIIR                 |           |               |
| 1099.6357        | 1099.6027        | -0.033         | -30        | 103        | 112        | ITPNSLVDIK              |           |               |
| 1101.6051        | 1101.594         | -0.0111        | -10        | 217        | 225        | IEHLYSAIR               | 17        | 0             |
| 1101.6051        | 1101.594         | -0.0111        | -10        | 217        | 225        | IEHLYSAIR               | 17        | 0             |
| 1101.6051        | 1101.594         | -0.0111        | -10        | 217        | 225        | IEHLYSAIR               |           |               |
| <b>1167.6198</b> | <b>1167.6062</b> | <b>-0.0136</b> | <b>-12</b> | <b>255</b> | <b>263</b> | <b>EALLYFFHK</b>        | <b>47</b> | <b>96.853</b> |
| 1167.6198        | 1167.6062        | -0.0136        | -12        | 255        | 263        | EALLYFFHK               |           |               |
| 1167.6198        | 1167.6062        | -0.0136        | -12        | 255        | 263        | EALLYFFHK               |           |               |
| 1339.7039        | 1339.7214        | 0.0175         | 13         | 52         | 64         | AYKSVLSGMNAAK           |           |               |
| 1409.7383        | 1409.6499        | -0.0884        | -63        | 150        | 162        | LSKISGQNTGNYK           |           |               |
| 1409.7383        | 1409.6499        | -0.0884        | -63        | 150        | 162        | LSKISGQNTGNYK           |           |               |
| 1409.7383        | 1409.6499        | -0.0884        | -63        | 150        | 162        | LSKISGQNTGNYK           |           |               |
| 1421.7675        | 1421.7631        | -0.0044        | -3         | 169        | 180        | IEQIFETAPFVK            |           |               |
| 1454.6772        | 1454.6688        | -0.0084        | -6         | 205        | 216        | FLAGTYDMFFSR            | 5         | 0             |
| 1454.6772        | 1454.6688        | -0.0084        | -6         | 205        | 216        | FLAGTYDMFFSR            | 5         | 0             |
| 1454.6772        | 1454.6688        | -0.0084        | -6         | 205        | 216        | FLAGTYDMFFSR            |           |               |
| 1470.6722        | 1470.6644        | -0.0078        | -5         | 205        | 216        | FLAGTYDMFFSR            |           |               |
| 1470.6722        | 1470.6644        | -0.0078        | -5         | 205        | 216        | FLAGTYDMFFSR            |           |               |
| 1470.6722        | 1470.6644        | -0.0078        | -5         | 205        | 216        | FLAGTYDMFFSR            |           |               |
| 1923.0474        | 1923.0842        | 0.0368         | 19         | 14         | 29         | VVSLKPEIIVDQYEYK        |           |               |
| 2004.9919        | 2005.0596        | 0.0677         | 34         | 113        | 130        | RTNVEGNWALTGGMELTR      |           |               |
| 2070.123         | 2070.1257        | 0.0027         | 1          | 131        | 149        | DPTVSEHASLVGLLSLYR      |           |               |
| 2092.1074        | 2092.1035        | -0.0039        | -2         | 163        | 180        | TNIADRIEQIFETAPFVK      |           |               |
| 2293.1421        | 2293.1704        | 0.0283         | 12         | 226        | 247        | VGTVV TAYEDCSGLVSFTGFIK |           |               |
| 2309.0808        | 2309.1472        | 0.0664         | 29         | 272        | 290        | MFEPGQETAVPHSYFIHFR     |           |               |
| 2395.179         | 2395.2205        | 0.0415         | 17         | 424        | 444        | YVSVSSNHQARPNSFAEFLNK   |           |               |

MS/MS Fragmentation of **EALLYFFHK (1167.6062, 1+)**

**4700 MS/MS Precursor 1167.61 Spec #1 MC[BP = 86.1, 253]**

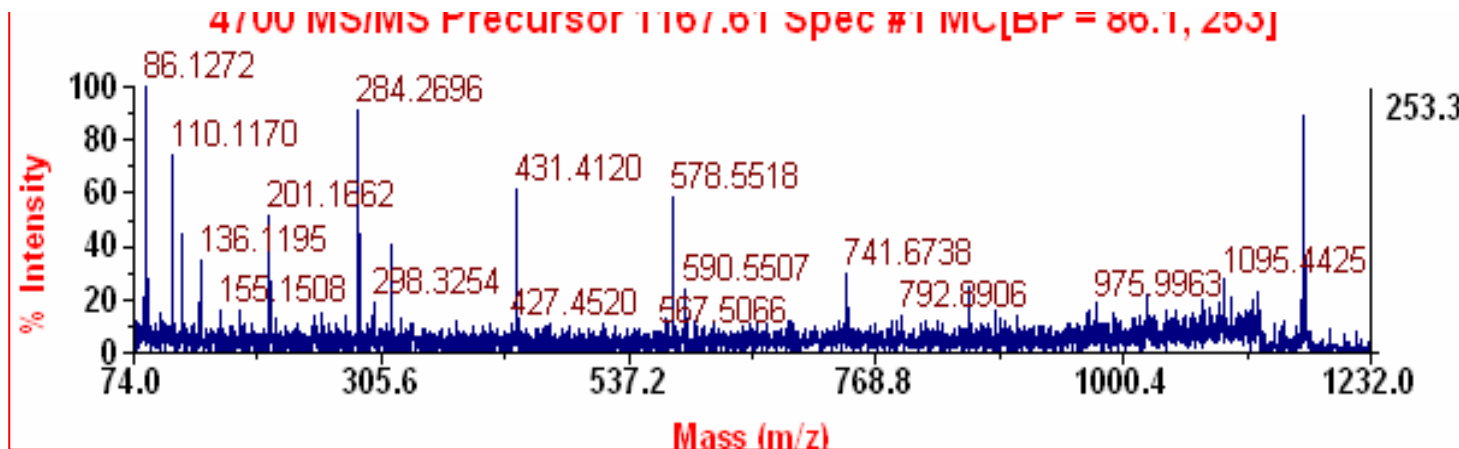

Spot No.5683      gi|39930275  
 Nucleoprotein [rabies virus]

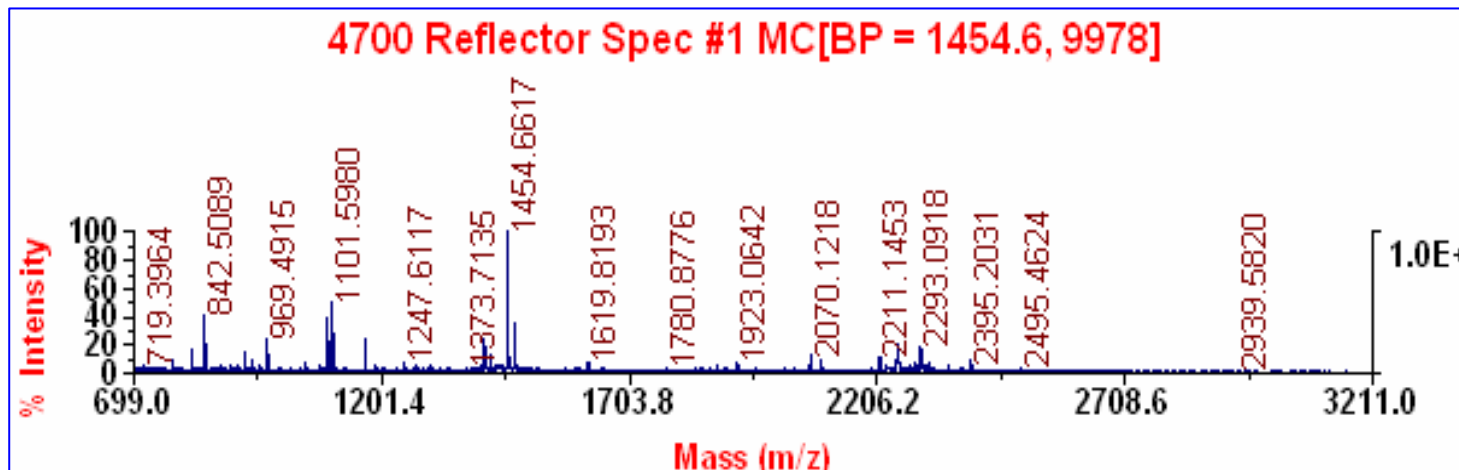

| Calc. Mass | Obsrv.Mass | ± da    | ± ppm | Start | Seq. | End Seq. | Sequence   | Ion Score | C. I. % |
|------------|------------|---------|-------|-------|------|----------|------------|-----------|---------|
| 778.3698   | 778.3687   | -0.0011 | -1    | 396   | 402  |          | IMMNGGR    |           |         |
| 815.4733   | 815.4728   | -0.0005 | -1    | 235   | 241  |          | QINLTAR    |           |         |
| 841.4202   | 841.4284   | 0.0082  | 10    | 346   | 351  |          | FFRDEK     |           |         |
| 912.4421   | 912.4698   | 0.0277  | 30    | 388   | 395  |          | SSEAVYTR   |           |         |
| 936.4421   | 936.4421   | 0       | 0     | 251   | 257  |          | NFEEEIR    |           |         |
| 1021.5095  | 1021.5024  | -0.0071 | -7    | 42    | 51   |          | SVLSGMNAAR |           |         |

|           |           |         |     |     |                           |           |
|-----------|-----------|---------|-----|-----|---------------------------|-----------|
| 1092.5432 | 1092.5388 | -0.0044 | -4  | 251 | 258 NFEEEEIRR             |           |
| 1101.6051 | 1101.5977 | -0.0074 | -7  | 204 | 212 IEHLYSAIR             | 36 78.937 |
| 1101.6051 | 1101.5977 | -0.0074 | -7  | 204 | 212 IEHLYSAIR             |           |
| 1167.6198 | 1167.6108 | -0.009  | -8  | 242 | 250 EAILYFFHK             |           |
| 1270.7366 | 1270.7206 | -0.016  | -13 | 90  | 100 ITPDSLVEIKR           |           |
| 1409.7383 | 1409.6428 | -0.0955 | -68 | 137 | 149 LSKISGQNTGNYK         |           |
| 1409.7383 | 1409.6428 | -0.0955 | -68 | 137 | 149 LSKISGQNTGNYK         |           |
| 1421.7675 | 1421.7594 | -0.0081 | -6  | 156 | 167 IEQIFETAPFVK          |           |
| 1454.6772 | 1454.662  | -0.0152 | -10 | 192 | 203 FLAGTYDMFFSR          | 52 99.471 |
| 1454.6772 | 1454.662  | -0.0152 | -10 | 192 | 203 FLAGTYDMFFSR          |           |
| 1470.6722 | 1470.6589 | -0.0133 | -9  | 192 | 203 FLAGTYDMFFSR          | 17 0      |
| 1470.6722 | 1470.6589 | -0.0133 | -9  | 192 | 203 FLAGTYDMFFSR          |           |
| 1864.9109 | 1864.8771 | -0.0338 | -18 | 101 | 117 TDVEGSWALTGVMELTR     |           |
| 1923.0474 | 1923.0635 | 0.0161  | 8   | 1   | 16 VVSLKPEIIVDQYEYK       |           |
| 2070.123  | 2070.1223 | -0.0007 | 0   | 118 | 136 DPTVSEHASLVGLLLSLYR   |           |
| 2092.1074 | 2092.1072 | -0.0002 | 0   | 150 | 167 TNIADRIEQIFETAPFVK    |           |
| 2293.0859 | 2293.0935 | 0.0076  | 3   | 259 | 277 MFEPGQETAVPHSYFIHFR   | 33 57.584 |
| 2293.0859 | 2293.0935 | 0.0076  | 3   | 259 | 277 MFEPGQETAVPHSYFIHFR   |           |
| 2309.0808 | 2309.1248 | 0.044   | 19  | 259 | 277 MFEPGQETAVPHSYFIHFR   |           |
| 2395.179  | 2395.2043 | 0.0253  | 11  | 411 | 431 YVSVSSNHQARPNSFAEFLNK |           |

### MS/MS Fragmentation of **FLAGTYDMFFSR (1454.662, 1+)**

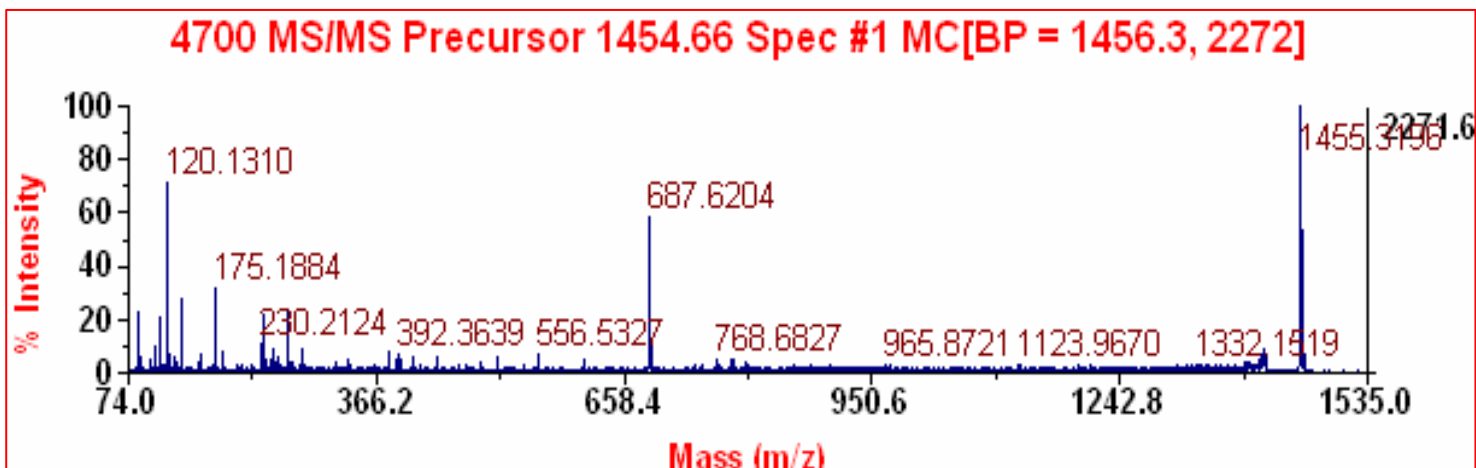



Spot No.6680

gi|38017865

Nucleoprotein [rabies virus]

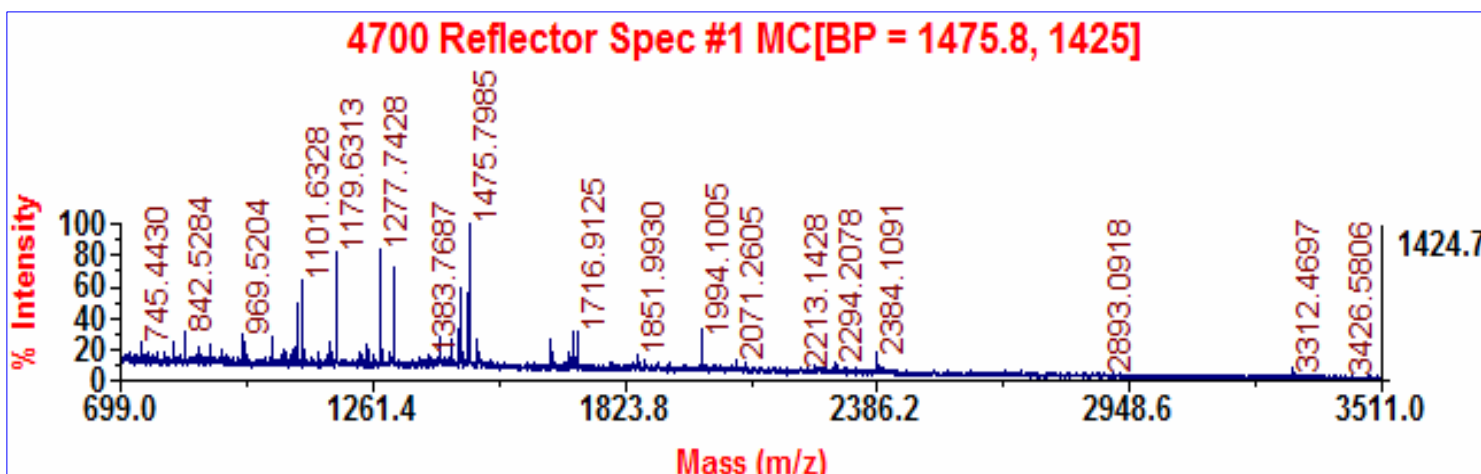

| Calc. Mass | Obsrv.Mass | ± da    | ± ppm | Start | Seq. | End Seq. | Sequence      | Ion Score | C. I. % |
|------------|------------|---------|-------|-------|------|----------|---------------|-----------|---------|
| 815.4733   | 815.4953   | 0.0220  | 27    | 209   | 215  |          | QINLTAR       |           |         |
| 1092.5432  | 1092.5631  | 0.0199  | 18    | 225   | 232  |          | NFEEEIRR      |           |         |
| 1101.6051  | 1101.6326  | 0.0275  | 25    | 178   | 186  |          | IEHLYSAIR     |           |         |
| 1101.6051  | 1101.6326  | 0.0275  | 25    | 178   | 186  |          | IEHLYSAIR     | 19        | 0       |
| 1167.6198  | 1167.6403  | 0.0205  | 18    | 216   | 224  |          | EAILYFFHK     |           |         |
| 1409.7383  | 1409.6761  | -0.0622 | -44   | 111   | 123  |          | LSKISGQNTGNYK |           |         |
| 1434.8354  | 1434.8120  | -0.0234 | -16   | 130   | 141  |          | IKQIFETAPFIK  |           |         |
| 1454.6772  | 1454.7185  | 0.0413  | 28    | 166   | 177  |          | FLAGTYDMFFSR  | 26        | 0       |
| 1454.677   | 1454.7185  | 0.0413  | 28    | 166   | 177  |          | FLAGTYDMFFSR  |           |         |
| 1470.6722  | 1470.7504  | 0.0782  | 53    | 166   | 177  |          | FLAGTYDMFFSR  |           |         |

MS/MS Fragmentation of FLAGTYDMFFSR (1454.7185, 1+)

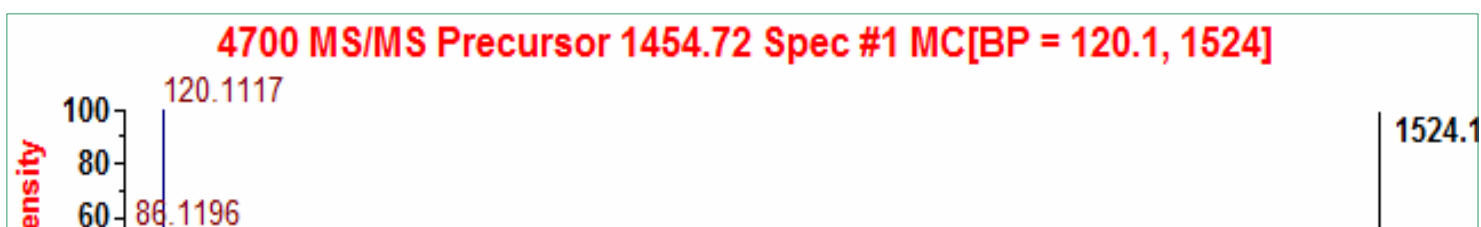

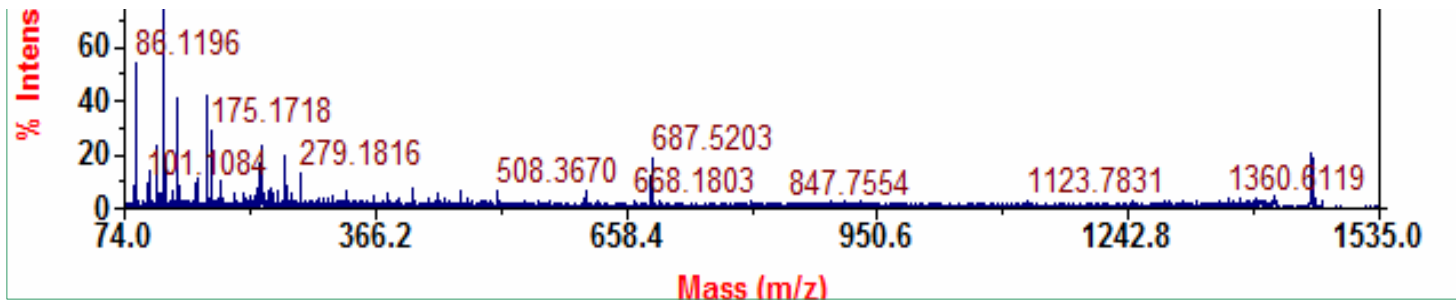

Spot No.3261                      gi|26355849  
 Unnamed protein product [Mus musculus]

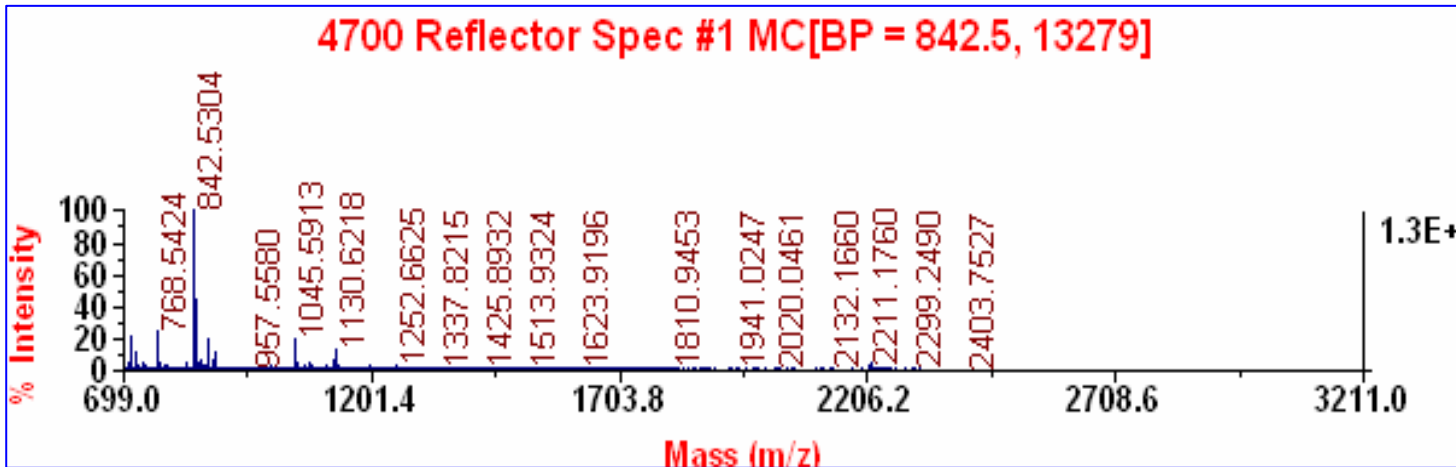

| Calc. Mass | Obsrv.Mass | ± da    | ± ppm | Start | Seq. | End Seq. | Sequence    | Ion Score | C. I. % |
|------------|------------|---------|-------|-------|------|----------|-------------|-----------|---------|
| 709.3483   | 709.3671   | 0.0188  | 27    | 277   | 282  |          | GRMSMK      |           |         |
| 738.3529   | 738.3729   | 0.02    | 27    | 235   | 240  |          | GSQQYR      |           |         |
| 1077.5323  | 1077.5634  | 0.0311  | 29    | 113   | 120  |          | IREEYPDR    |           |         |
| 1077.5323  | 1077.5634  | 0.0311  | 29    | 113   | 120  |          | IREEYPDR    |           |         |
| 1130.5953  | 1130.6217  | 0.0264  | 23    | 200   | 209  |          | FPGQLNADLR  | 23        | 0       |
| 1130.5953  | 1130.6217  | 0.0264  | 23    | 200   | 209  |          | FPGQLNADLR  |           |         |
| 1159.6293  | 1159.6482  | 0.0189  | 16    | 211   | 220  |          | LAVNMVPFPR  |           |         |
| 1252.7161  | 1252.6619  | -0.0542 | -43   | 268   | 278  |          | YLTVAAVFRGR |           |         |
| 1252.7161  | 1252.6619  | -0.0542 | -43   | 268   | 278  |          | YLTVAAVFRGR |           |         |
| 1258.6902  | 1258.717   | 0.0268  | 21    | 200   | 210  |          | FPGQLNADLRK |           |         |

### MS/MS Fragmentation of FPGQLNADLR (1130.6217,1+)

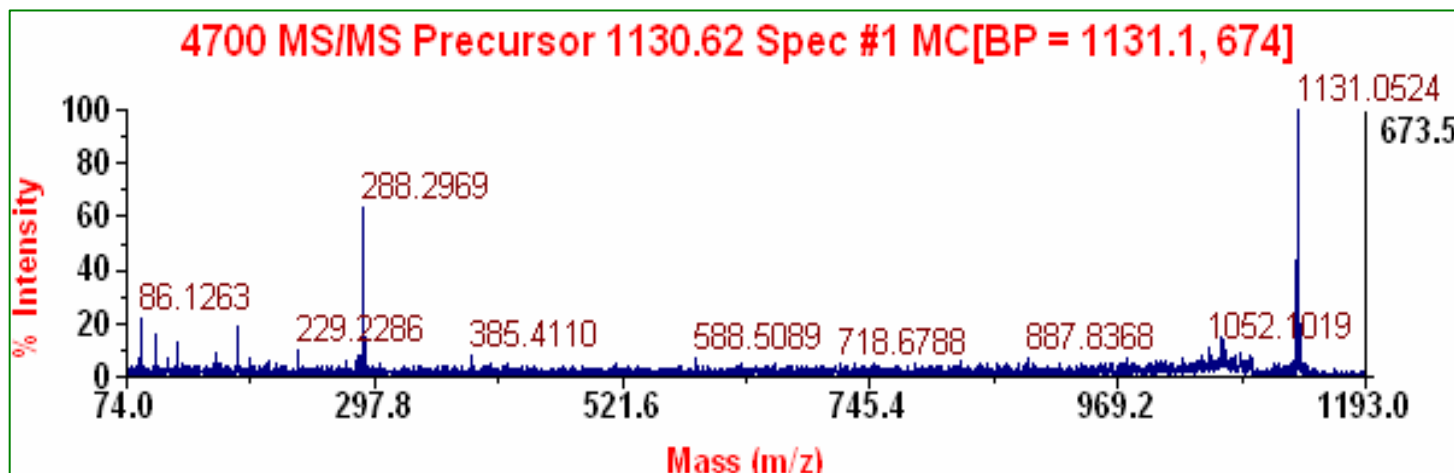

Spot No.3432      gi|7106439  
 Tubulin, beta 5 [Mus musculus]

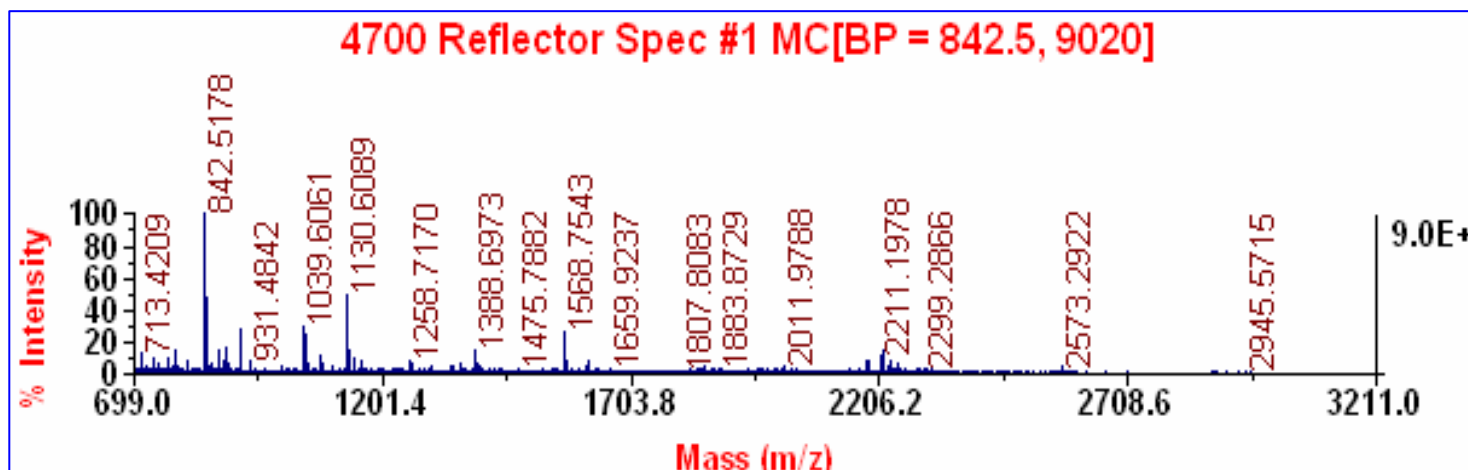

| Calc. Mass | Obsrv.Mass | ± da   | ± ppm | Start | Seq. | End Seq. | Sequence | Ion Score | C. I. % |
|------------|------------|--------|-------|-------|------|----------|----------|-----------|---------|
| 709.3483   | 709.3511   | 0.0028 | 4     | 319   | 324  |          | GRMSMK   |           |         |
| 738.3529   | 738.3593   | 0.0064 | 9     | 277   | 282  |          | GSQQYR   |           |         |

|           |           |        |    |     |                        |    |       |
|-----------|-----------|--------|----|-----|------------------------|----|-------|
| 1039.5935 | 1039.6058 | 0.0123 | 12 | 310 | 318 YLTVAAVFR          | 31 | 83.03 |
| 1039.5935 | 1039.6058 | 0.0123 | 12 | 310 | 318 YLTVAAVFR          |    |       |
| 1077.5323 | 1077.5496 | 0.0173 | 16 | 155 | 162 IREEYPDR           |    |       |
| 1130.5953 | 1130.6085 | 0.0132 | 12 | 242 | 251 FPGQLNADLR         | 44 | 99.16 |
| 1130.5953 | 1130.6085 | 0.0132 | 12 | 242 | 251 FPGQLNADLR         |    |       |
| 1143.6343 | 1143.6475 | 0.0132 | 12 | 253 | 262 LAVNMVPFPR         |    |       |
| 1159.6293 | 1159.6404 | 0.0111 | 10 | 253 | 262 LAVNMVPFPR         |    |       |
| 1258.6902 | 1258.7173 | 0.0271 | 22 | 242 | 252 FPGQLNADLRK        |    |       |
| 1301.6372 | 1301.6819 | 0.0447 | 34 | 47  | 58 ISVYYNEATGGK        |    |       |
| 1615.8359 | 1615.8591 | 0.0232 | 14 | 63  | 77 AILDLEPGTMDSVR      |    |       |
| 1631.8309 | 1631.8546 | 0.0237 | 15 | 63  | 77 AILDLEPGTMDSVR      |    |       |
| 1636.8304 | 1636.8665 | 0.0361 | 22 | 263 | 276 LHFFMPGFAPLTSR     |    |       |
| 1659.8953 | 1659.9293 | 0.034  | 20 | 283 | 297 ALTVPELTQQVFDAK    |    |       |
| 1958.9818 | 1959.0319 | 0.0501 | 26 | 104 | 121 GHYTEGAELVDSVLDVVR |    |       |

**MS/MS Fragmentation of FPGQLNADLR (1130.6085,1+)**

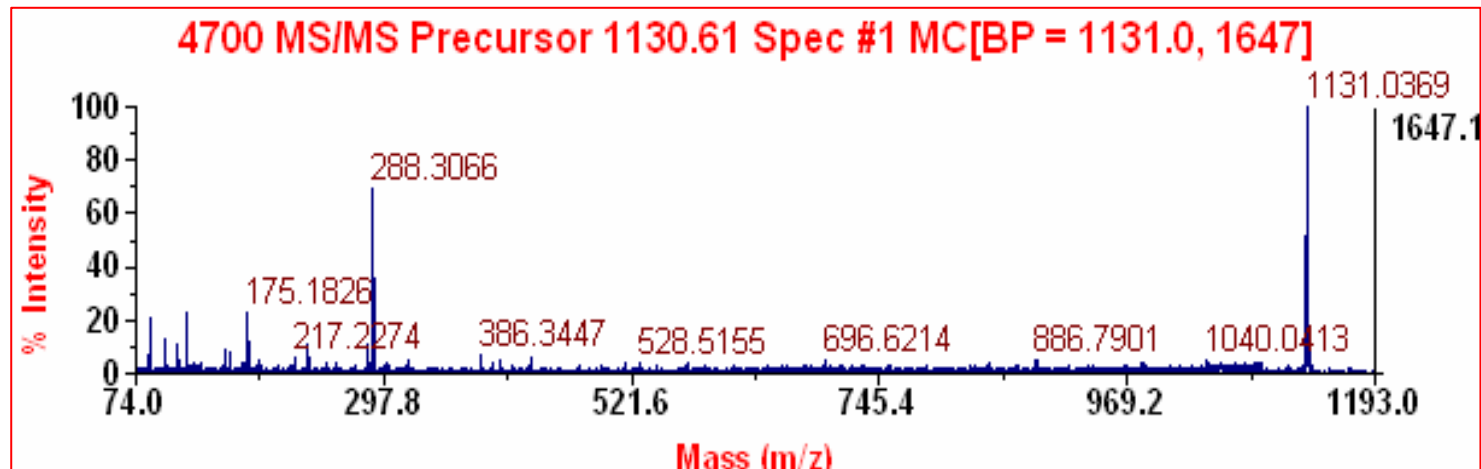

Spot No.3447

gi|202210

Alpha-tubulin isotype M-alpha-2 [Mus musculus]

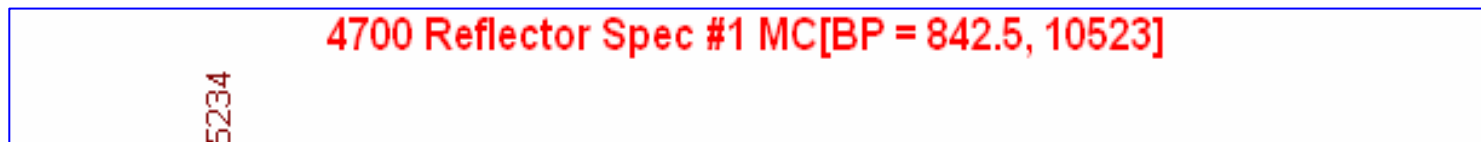

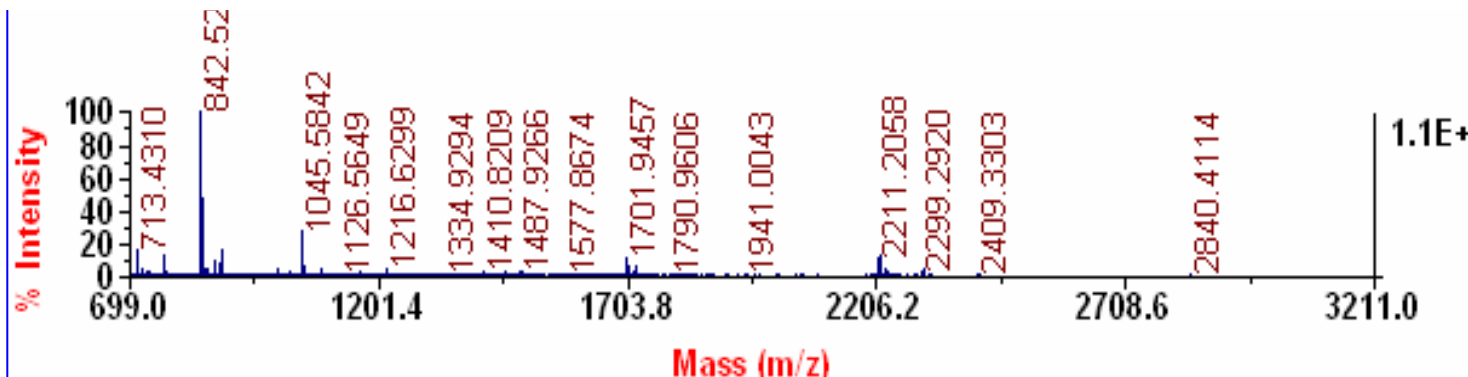

| Calc. Mass | Obsrv. Mass | ± da   | ± ppm | Start | Seq. | End Seq.              | Sequence | Ion Score | C. I. % |
|------------|-------------|--------|-------|-------|------|-----------------------|----------|-----------|---------|
| 1023.449   | 1023.4754   | 0.0264 | 26    | 97    | 105  | EDAANNYAR             |          |           |         |
| 1085.6201  | 1085.6433   | 0.0232 | 21    | 113   | 121  | EIIDLVLDR             |          |           |         |
| 1410.774   | 1410.8201   | 0.0461 | 33    | 85    | 96   | QLFHPEQLITGK          | 28       | 51.27     |         |
| 1410.774   | 1410.8201   | 0.0461 | 33    | 85    | 96   | QLFHPEQLITGK          |          |           |         |
| 1487.8792  | 1487.9265   | 0.0473 | 32    | 230   | 243  | LISQIVSSITASLR        | 18       | 0         |         |
| 1487.8792  | 1487.9265   | 0.0473 | 32    | 230   | 243  | LISQIVSSITASLR        |          |           |         |
| 1701.9058  | 1701.9457   | 0.0399 | 23    | 65    | 79   | AVFVDLEPTVIDEVR       | 50       | 99.703    |         |
| 1701.9058  | 1701.9457   | 0.0399 | 23    | 65    | 79   | AVFVDLEPTVIDEVR       |          |           |         |
| 1718.8821  | 1718.9323   | 0.0502 | 29    | 216   | 229  | NLDIERPTYTNLNR        | 13       | 0         |         |
| 1718.8821  | 1718.9323   | 0.0502 | 29    | 216   | 229  | NLDIERPTYTNLNR        |          |           |         |
| 1756.9633  | 1757.0457   | 0.0824 | 47    | 265   | 280  | IHFPLATYAPVISA EK     |          |           |         |
| 2409.2085  | 2409.333    | 0.1245 | 52    | 244   | 264  | FDGALNVDLTEFQTNLVPYPR |          |           |         |

**MS/MS Fragmentation of AVFVDLEPTVIDEVR(1701.9457, 1+)**

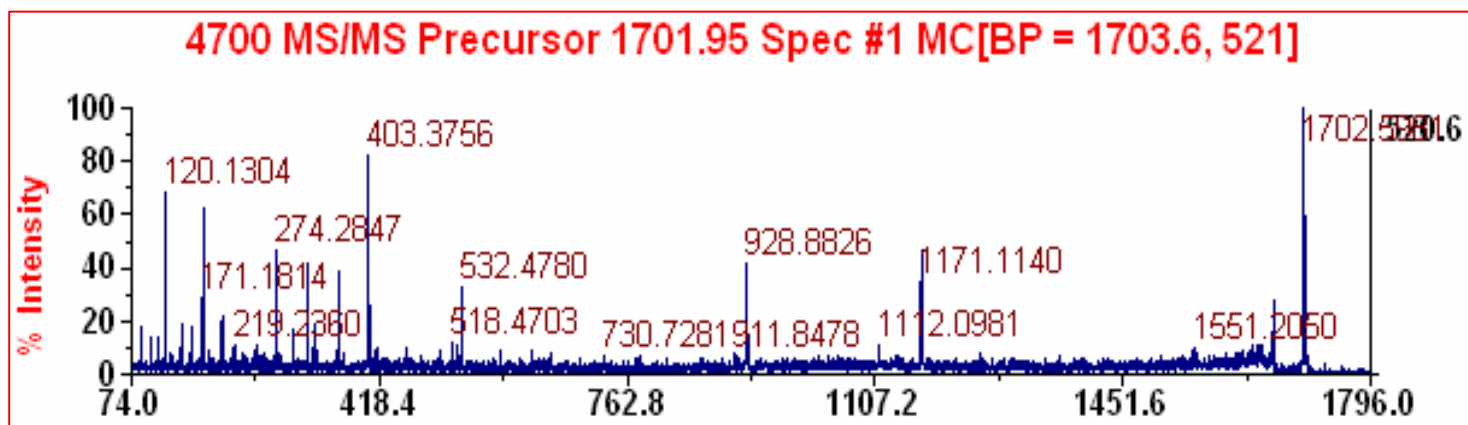

|      |       |       |        |        |        |
|------|-------|-------|--------|--------|--------|
| 74.0 | 418.4 | 762.8 | 1107.2 | 1451.6 | 1796.0 |
|------|-------|-------|--------|--------|--------|

**Mass (m/z)**

**Spot No.1649**                      **gi|2253159**

Peripherin [Mus musculus]

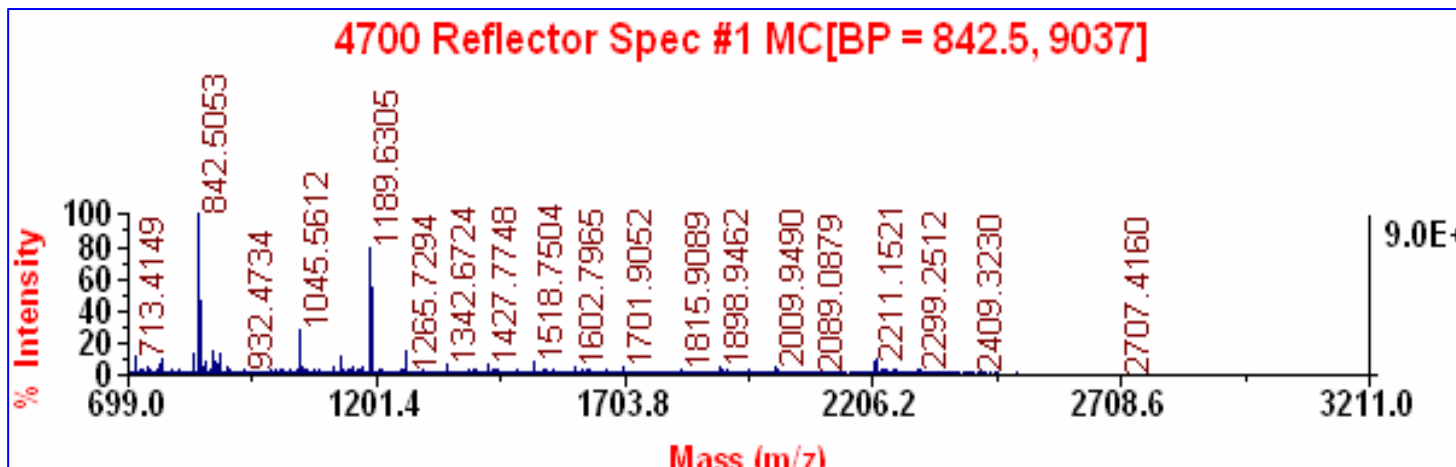

| Calc. Mass       | Obsrv.Mass     | ± da           | ± ppm     | Start Seq. | End Seq.   | Sequence          | Ion Score | C. I. %       |
|------------------|----------------|----------------|-----------|------------|------------|-------------------|-----------|---------------|
| 739.3845         | 739.3815       | -0.003         | -4        | 305        | 310        | NHEALR            |           |               |
| 760.3948         | 760.3889       | -0.0059        | -8        | 131        | 137        | GELSQAR           |           |               |
| 788.4148         | 788.4263       | 0.0115         | 15        | 365        | 370        | LEEELR            |           |               |
| 829.4777         | 829.476        | -0.0017        | -2        | 158        | 164        | ELELLGR           |           |               |
| 868.4562         | 868.4961       | 0.0399         | 46        | 112        | 118        | FANFIEK           |           |               |
| 873.4788         | 873.4772       | -0.0016        | -2        | 335        | 342        | GTNEALLR          |           |               |
| 901.485          | 901.485        | 0              | 0         | 167        | 173        | DRVQVER           |           |               |
| 932.4683         | 932.4734       | 0.0051         | 5         | 403        | 410        | LLEGEESR          |           |               |
| 985.5789         | 985.5742       | -0.0047        | -5        | 157        | 164        | RELELLGR          |           |               |
| 1053.5687        | 1053.556       | -0.0127        | -12       | 234        | 241        | KLHEEELR          |           |               |
| 1060.5382        | 1060.5424      | 0.0042         | 4         | 185        | 192        | QRLEEETR          |           |               |
| 1114.6215        | 1114.6134      | -0.0081        | -7        | 158        | 166        | ELELLGRER         |           |               |
| 1143.5753        | 1143.6277      | 0.0524         | 46        | 17         | 26         | SSISSTSYRR        |           |               |
| <b>1189.6324</b> | <b>1189.63</b> | <b>-0.0024</b> | <b>-2</b> | <b>121</b> | <b>130</b> | <b>FLEQQNAALR</b> | <b>38</b> | <b>95.681</b> |
| 1189.6324        | 1189.63        | -0.0024        | -2        | 121        | 130        | FLEQQNAALR        |           |               |

|           |           |         |     |     |                            |    |   |
|-----------|-----------|---------|-----|-----|----------------------------|----|---|
| 1295.6664 | 1295.6566 | -0.0098 | -8  | 391 | 401 MALDIEIATYR            |    |   |
| 1342.675  | 1342.6725 | -0.0025 | -2  | 195 | 205 EDAEHNLVFR             |    |   |
| 1399.7539 | 1399.7606 | 0.0067  | 5   | 174 | 186 DGLAEDLAALKQR          |    |   |
| 1444.8019 | 1444.7516 | -0.0503 | -35 | 119 | 130 VRFLEQQNAALR           |    |   |
| 1484.8472 | 1484.842  | -0.0052 | -4  | 411 | 424 ISVPVHSFASLSLK         |    |   |
| 1541.8435 | 1541.8345 | -0.009  | -6  | 379 | 390 HLREYQELLNVK           |    |   |
| 1601.8064 | 1601.8245 | 0.0181  | 11  | 144 | 156 ADQLCQQELRELRL         |    |   |
| 1602.7719 | 1602.7928 | 0.0209  | 13  | 99  | 111 SNEKQELQELNDR          |    |   |
| 1631.8235 | 1631.8165 | -0.007  | -4  | 207 | 220 DVDDATLSRLELER         |    |   |
| 1815.8733 | 1815.913  | 0.0397  | 22  | 295 | 310 YADLSDAANRNHEALR       |    |   |
| 1955.9531 | 1955.9534 | 0.0003  | 0   | 82  | 98 LDFSMAEALNQEFLATR       |    |   |
| 1971.948  | 1971.98   | 0.032   | 16  | 82  | 98 LDFSMAEALNQEFLATR       |    |   |
| 2009.9563 | 2009.9465 | -0.0098 | -5  | 346 | 364 ELEEQFALEAGGYQAGAAR    | 15 | 0 |
| 2009.9563 | 2009.9465 | -0.0098 | -5  | 346 | 364 ELEEQFALEAGGYQAGAAR    |    |   |
| 2298.1038 | 2298.1909 | 0.0871  | 38  | 274 | 292 AQYENIAAKNLQEAEEWYK    |    |   |
| 2407.2    | 2407.2092 | 0.0092  | 4   | 343 | 364 QLRELEEQFALEAGGYQAGAAR |    |   |

**MS/MS Fragmentation of FLEQQNAALR (1189.63,1+)**

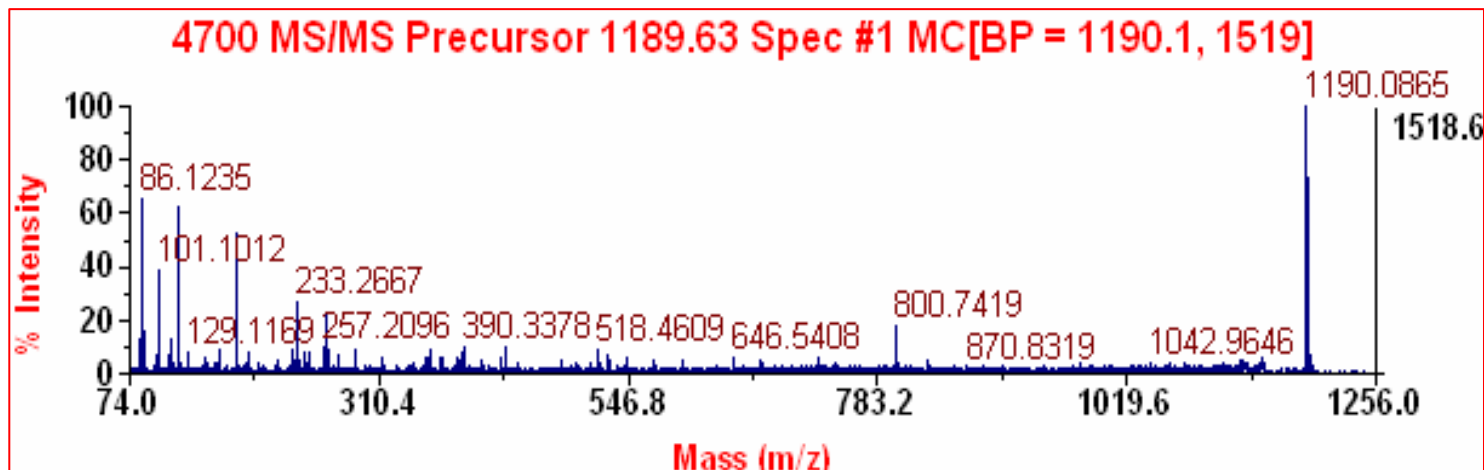

**Spot No.3272**                      **gi|2253159**

Peripherin [Mus musculus]

**4700 Reflector Spec #1 MC[BP = 842.5, 10512]**

4700 Reflector Spec #1 MC[BP = 842.5, 10512]

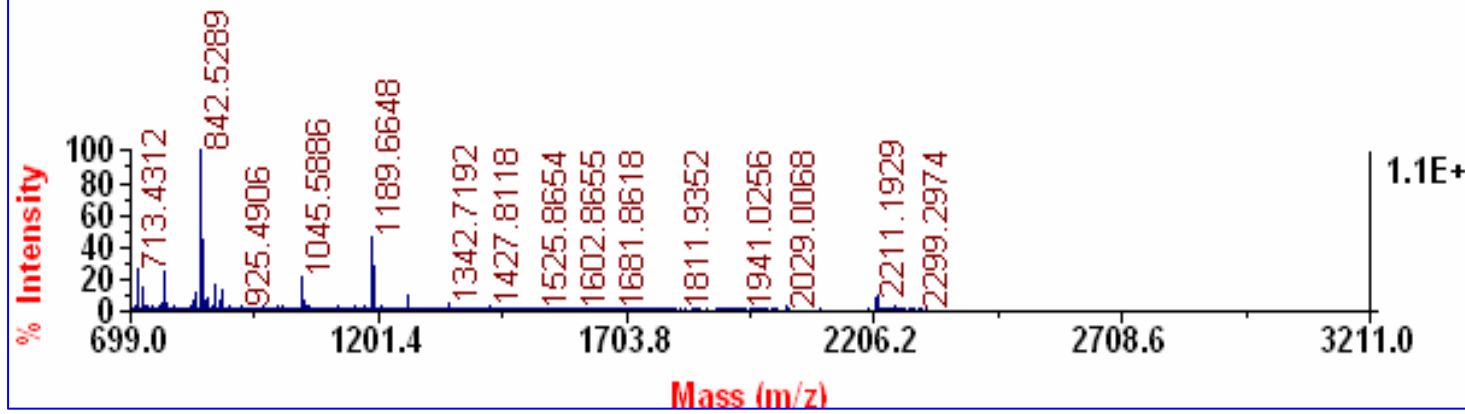

| Calc. Mass | Obsrv.Mass | ± da    | ± ppm | Start | Seq. End | Seq. Sequence        | Ion Score | C. I. % |
|------------|------------|---------|-------|-------|----------|----------------------|-----------|---------|
| 760.3948   | 760.4161   | 0.0213  | 28    | 131   | 137      | GELSQAR              |           |         |
| 787.4672   | 787.4589   | -0.0083 | -11   | 216   | 221      | LELERK               |           |         |
| 811.4896   | 811.4924   | 0.0028  | 3     | 69    | 76       | APRAGALR             |           |         |
| 829.4777   | 829.4946   | 0.0169  | 20    | 158   | 164      | ELELLGR              |           |         |
| 901.485    | 901.509    | 0.024   | 27    | 167   | 173      | DRVQVER              |           |         |
| 925.4737   | 925.4906   | 0.0169  | 18    | 235   | 241      | LHEEELR              |           |         |
| 1053.5687  | 1053.5972  | 0.0285  | 27    | 234   | 241      | KLHEEELR             |           |         |
| 1053.5687  | 1053.5972  | 0.0285  | 27    | 234   | 241      | KLHEEELR             |           |         |
| 1060.5382  | 1060.5453  | 0.0071  | 7     | 185   | 192      | QRLEEETR             |           |         |
| 1118.5801  | 1118.6107  | 0.0306  | 27    | 52    | 63       | LLGSGSPSSSAR         |           |         |
| 1189.6324  | 1189.6644  | 0.032   | 27    | 121   | 130      | FLEQQNAALR           | 36        | 93.087  |
| 1189.6324  | 1189.6644  | 0.032   | 27    | 121   | 130      | FLEQQNAALR           |           |         |
| 1203.5786  | 1203.6403  | 0.0617  | 51    | 144   | 153      | ADQLCQQELR           |           |         |
| 1342.675   | 1342.717   | 0.042   | 31    | 195   | 205      | EDAEHNLVLF           | 12        | 0       |
| 1342.675   | 1342.717   | 0.042   | 31    | 195   | 205      | EDAEHNLVLF           |           |         |
| 1498.7761  | 1498.8153  | 0.0392  | 26    | 194   | 205      | REDAEHNLVLF          |           |         |
| 1541.8435  | 1541.8104  | -0.0331 | -21   | 379   | 390      | HLREYQELLNVK         |           |         |
| 1602.7719  | 1602.8657  | 0.0938  | 59    | 99    | 111      | SNEKQELQELNDR        |           |         |
| 1955.9531  | 1956.0193  | 0.0662  | 34    | 82    | 98       | LDFSMAEALNQEFLATR    |           |         |
| 1971.948   | 1972.0549  | 0.1069  | 54    | 82    | 98       | LDFSMAEALNQEFLATR    |           |         |
| 2028.9662  | 2029.0042  | 0.038   | 19    | 27    | 46       | TFGPPPSLSPGAFSYSSSSR |           |         |
| 2028.9662  | 2029.0042  | 0.038   | 19    | 27    | 46       | TFGPPPSLSPGAFSYSSSSR |           |         |
| 2298.1038  | 2298.2969  | 0.1931  | 84    | 274   | 292      | AQYENIAAKNLQEAEEWYK  |           |         |



**MS/MS Fragmentation of FLEQQNAALR (1189.6644, 1+)**

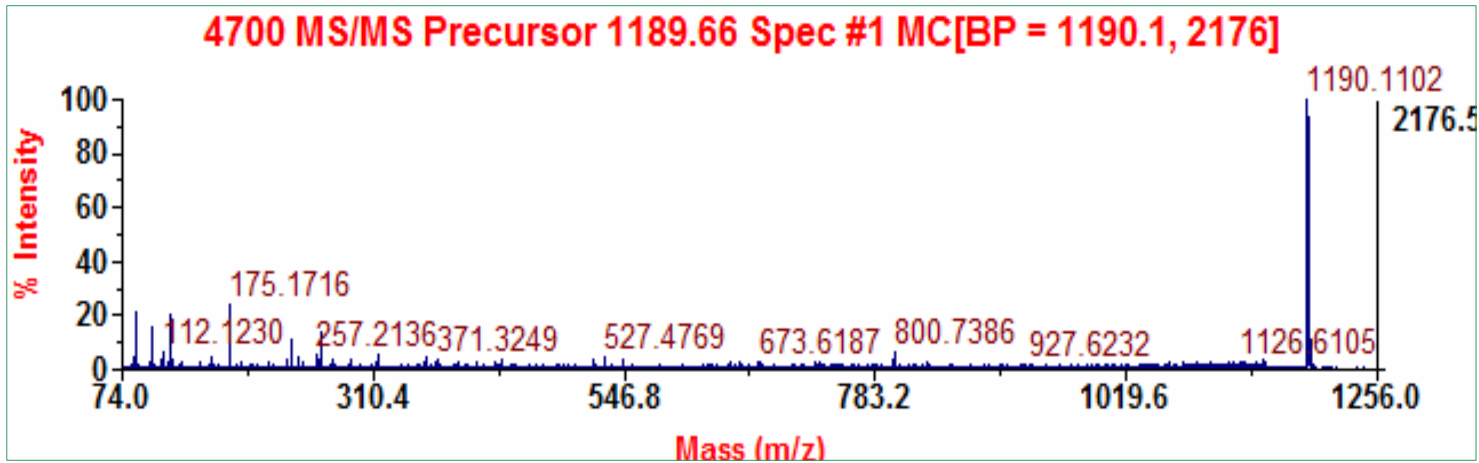

**Spot No.3375**

**gi|49868**

put. beta-actin (aa 27-375) [Mus musculus]

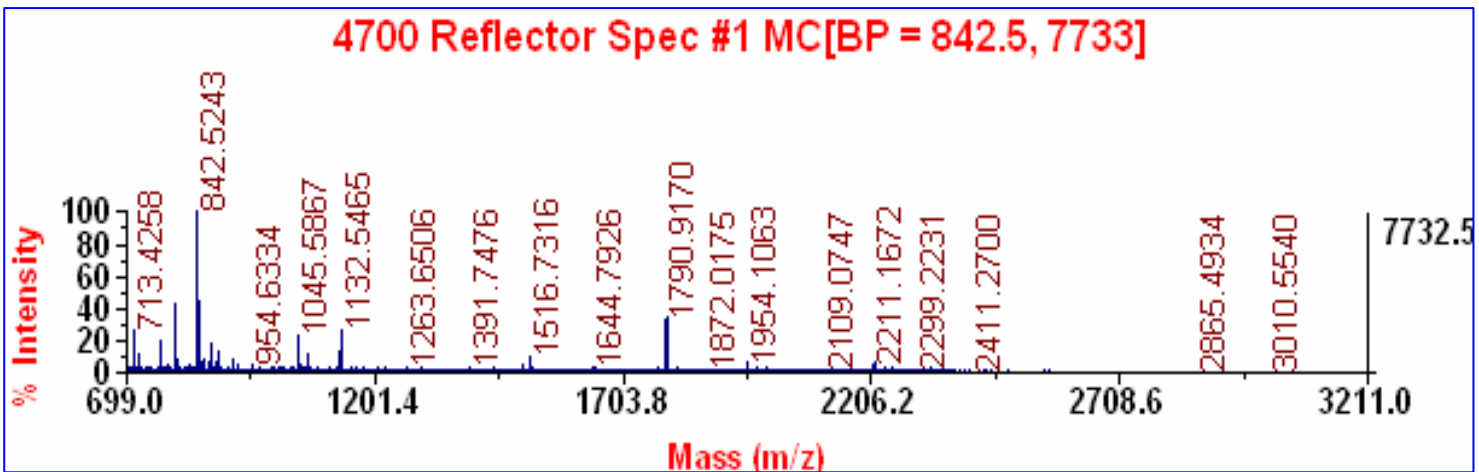

| Calc. Mass | Obsrv.Mass | ± da   | ± ppm | Start | Seq. | End Seq. | Sequence | Ion Score | C. I. % |
|------------|------------|--------|-------|-------|------|----------|----------|-----------|---------|
| 795.4723   | 795.4829   | 0.0106 | 13    | 303   | 309  | IIAPPER  |          |           |         |
| 800.5352   | 800.5449   | 0.0097 | 12    | 36    | 42   | RGILTLK  |          |           |         |
| 923.5672   | 923.5899   | 0.0227 | 25    | 303   | 310  | IIAPPERK |          |           |         |

|           |           |         |    |     |                           |           |
|-----------|-----------|---------|----|-----|---------------------------|-----------|
| 1132.527  | 1132.5461 | 0.0191  | 17 | 171 | 180 GYSFTTTAER            | 39 96.195 |
| 1132.527  | 1132.5461 | 0.0191  | 17 | 171 | 180 GYSFTTTAER            |           |
| 1516.7026 | 1516.7313 | 0.0287  | 19 | 334 | 346 QEYDESGPSIVHR         | 48 99.53  |
| 1516.7026 | 1516.7313 | 0.0287  | 19 | 334 | 346 QEYDESGPSIVHR         |           |
| 1644.7976 | 1644.7889 | -0.0087 | -5 | 334 | 347 QEYDESGPSIVHRK        |           |
| 1790.892  | 1790.9172 | 0.0252  | 14 | 213 | 228 SYELPDGQVITIGNER      | 47 99.454 |
| 1790.892  | 1790.9172 | 0.0252  | 14 | 213 | 228 SYELPDGQVITIGNER      |           |
| 1954.0645 | 1954.1057 | 0.0412  | 21 | 70  | 87 VAPEEHPVLLTEAPLNPK     | 70 99.997 |
| 1954.0645 | 1954.1057 | 0.0412  | 21 | 70  | 87 VAPEEHPVLLTEAPLNPK     |           |
| 2215.0698 | 2215.145  | 0.0752  | 34 | 266 | 286 DLYANTVLSGGTTMYPGIADR |           |
| 2231.0649 | 2231.1848 | 0.1199  | 54 | 266 | 286 DLYANTVLSGGTTMYPGIADR |           |

### MS/MS Fragmentation of GYSFTTTAER (1132.5461, 1+)

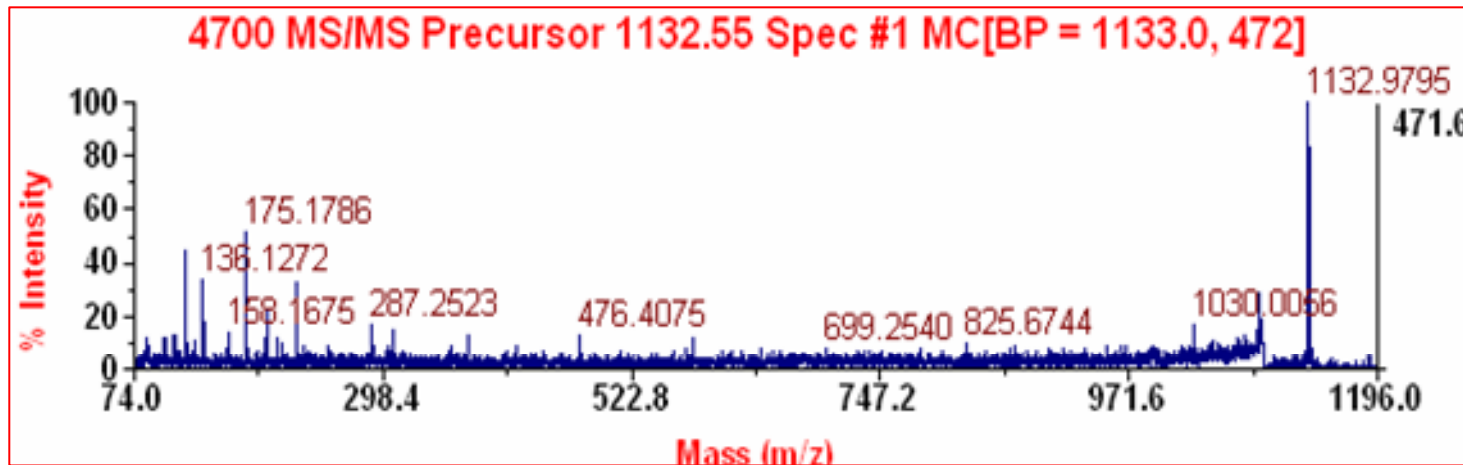

### MS/MS Fragmentation of QEYDESGPSIVHR (1516.7313, 1+)

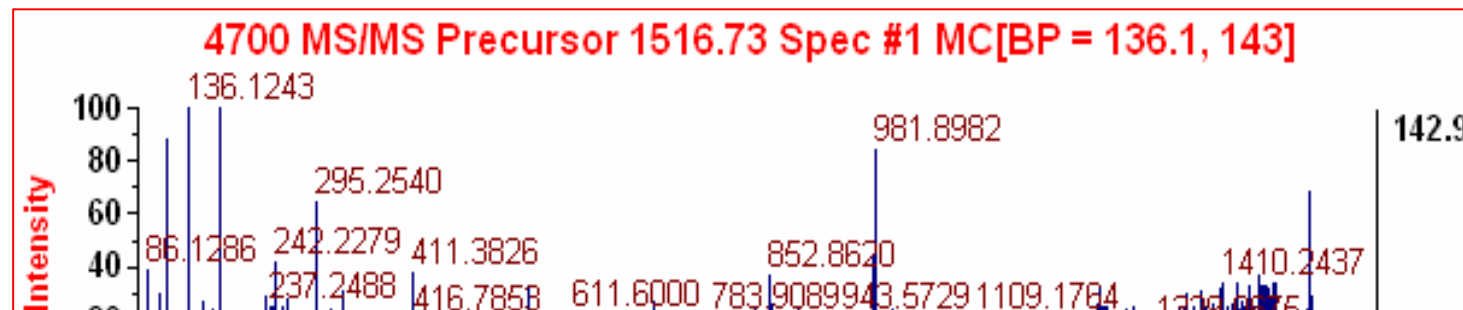

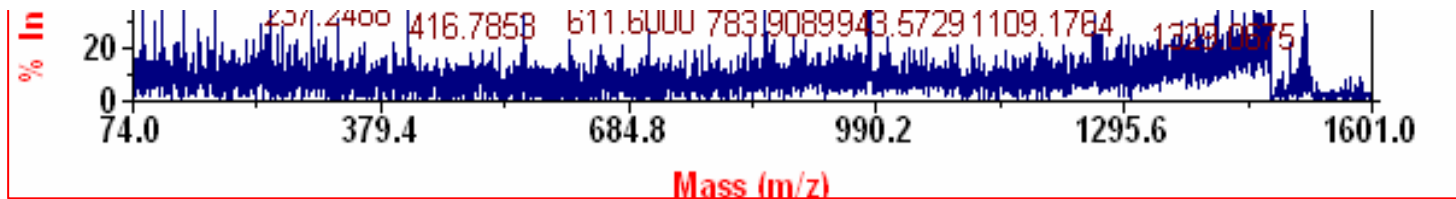

MS/MS Fragmentation of **SYELPDGQVITIGNER (1790.9172, 1+)**

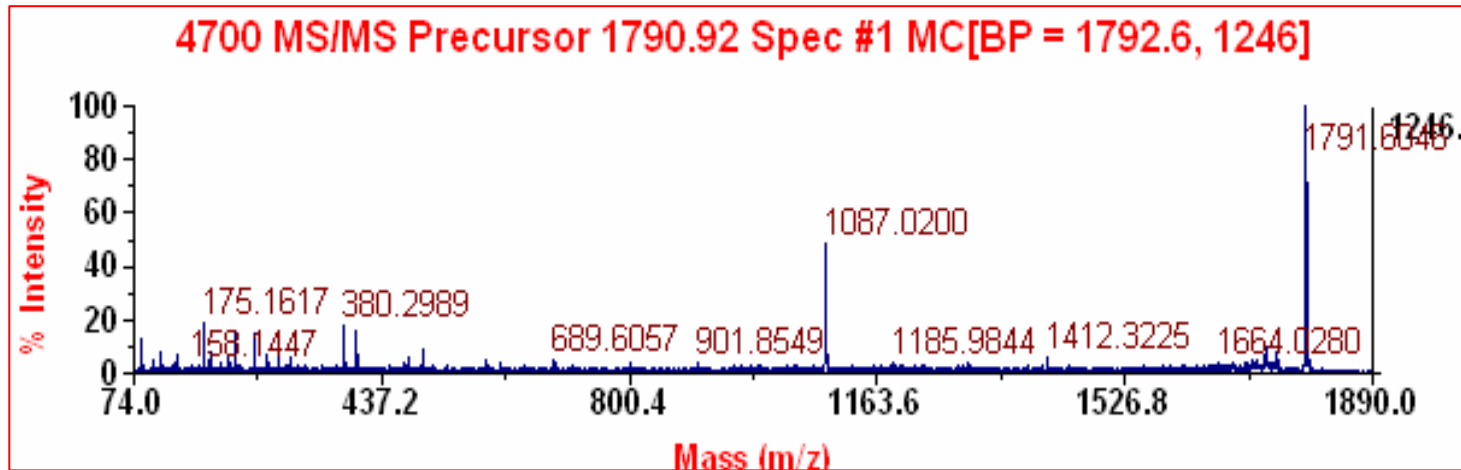

MS/MS Fragmentation of **VAPEEHPVLLTEAPLNPK (1954.1057, 1+)**

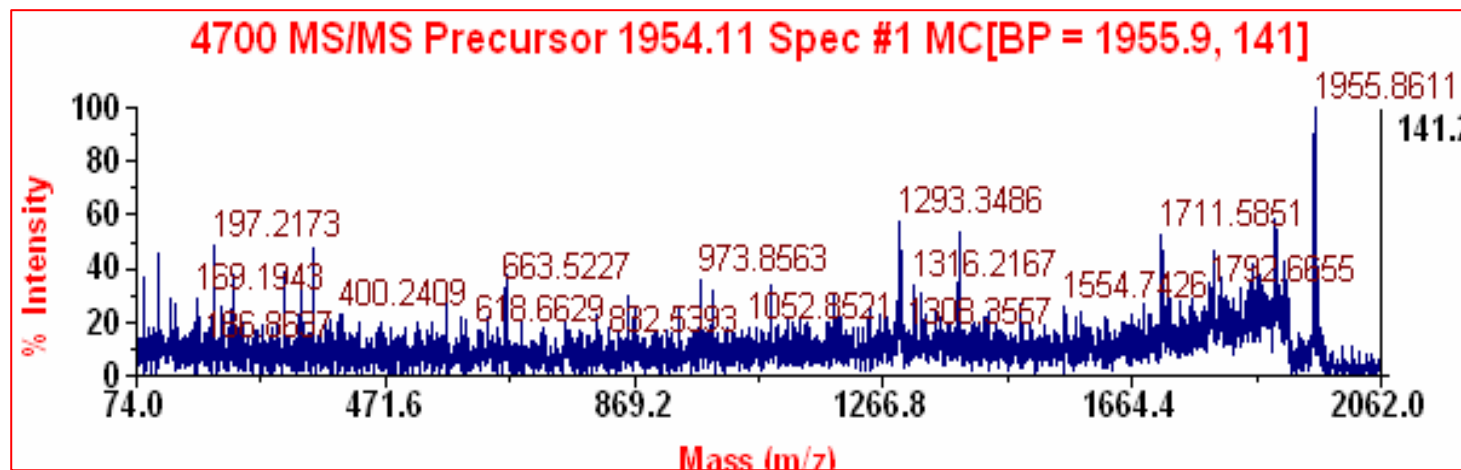

Spot No.3461

gi|148693874

Isocitrate dehydrogenase 3 (NAD+) alpha, isoform CRA\_d [Mus musculus]

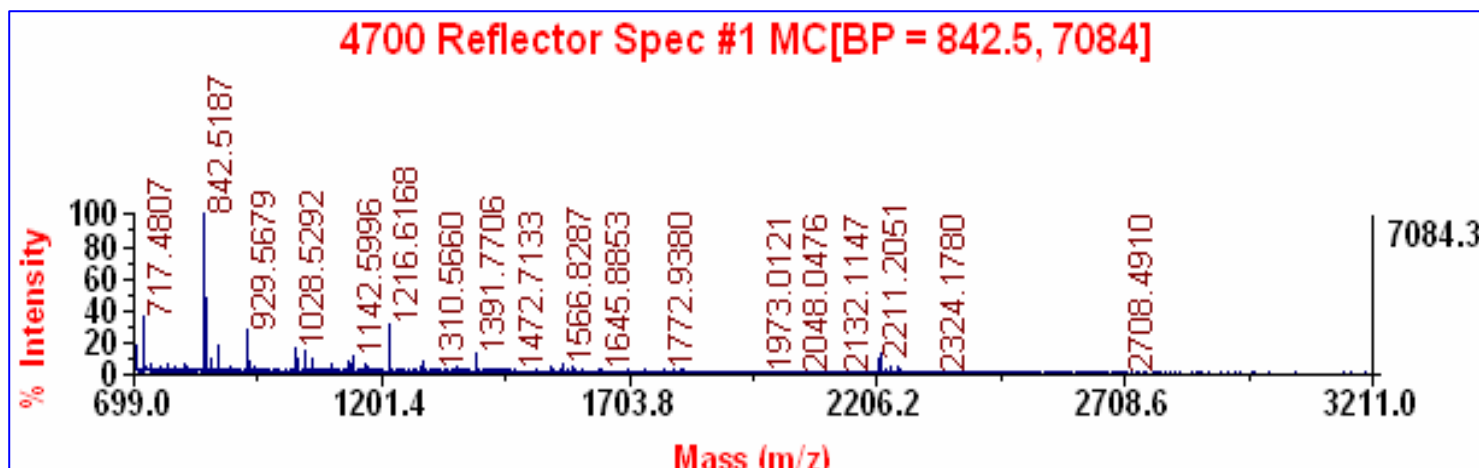

| Calc. Mass | Obsrv.Mass | ± da    | ± ppm | Start Seq. | End Seq. | Sequence        | Ion Score | C. I. % |
|------------|------------|---------|-------|------------|----------|-----------------|-----------|---------|
| 1028.516   | 1028.5288  | 0.0128  | 12    | 56         | 63       | APIQWEER        | 11        | 0       |
| 1028.516   | 1028.5288  | 0.0128  | 12    | 56         | 63       | APIQWEER        |           |         |
| 1142.5411  | 1142.5978  | 0.0567  | 50    | 314        | 323      | HMGLFDHAAK      |           |         |
| 1216.5997  | 1216.6163  | 0.0166  | 14    | 176        | 185      | IAEFAFEYAR      | 31        | 57.1    |
| 1216.5997  | 1216.6163  | 0.0166  | 14    | 176        | 185      | IAEFAFEYAR      |           |         |
| 1353.7896  | 1353.6729  | -0.1167 | -86   | 2          | 14       | RMRPGVAAVA AVR  |           |         |
| 1391.7529  | 1391.7712  | 0.0183  | 13    | 132        | 143      | TPYTDVNIVTIR    | 5         | 0       |
| 1391.7529  | 1391.7712  | 0.0183  | 13    | 132        | 143      | TPYTDVNIVTIR    |           |         |
| 1590.8784  | 1590.8972  | 0.0188  | 12    | 98         | 112      | TPIAAGHPSMNNLLR |           |         |
| 1606.8734  | 1606.9371  | 0.0637  | 40    | 98         | 112      | TPIAAGHPSMNNLLR |           |         |

MS/MS Fragmentation of IAEFAFEYAR (1216.6163, 1+)

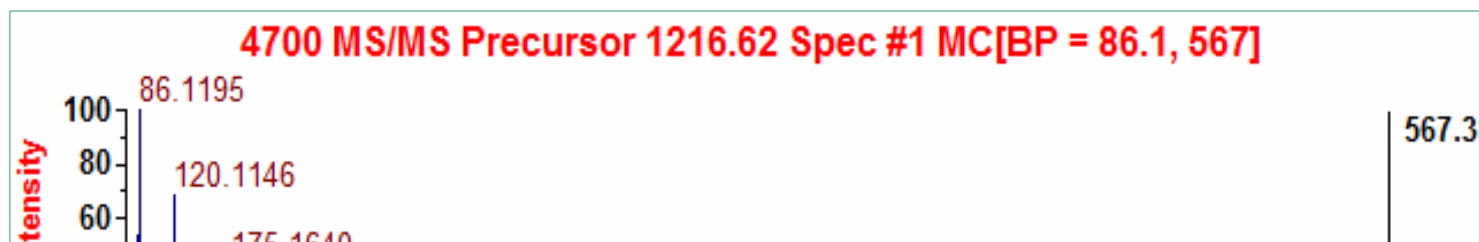

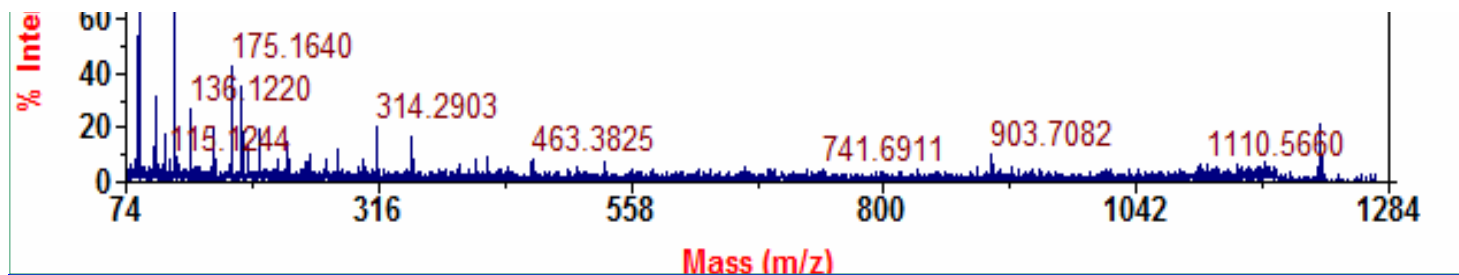

Spot No.5674

gi|21313536

Dihydrolipoamide S-succinyltransferase (E2 component of 2-oxo-glutarate complex) [Mus musculus]

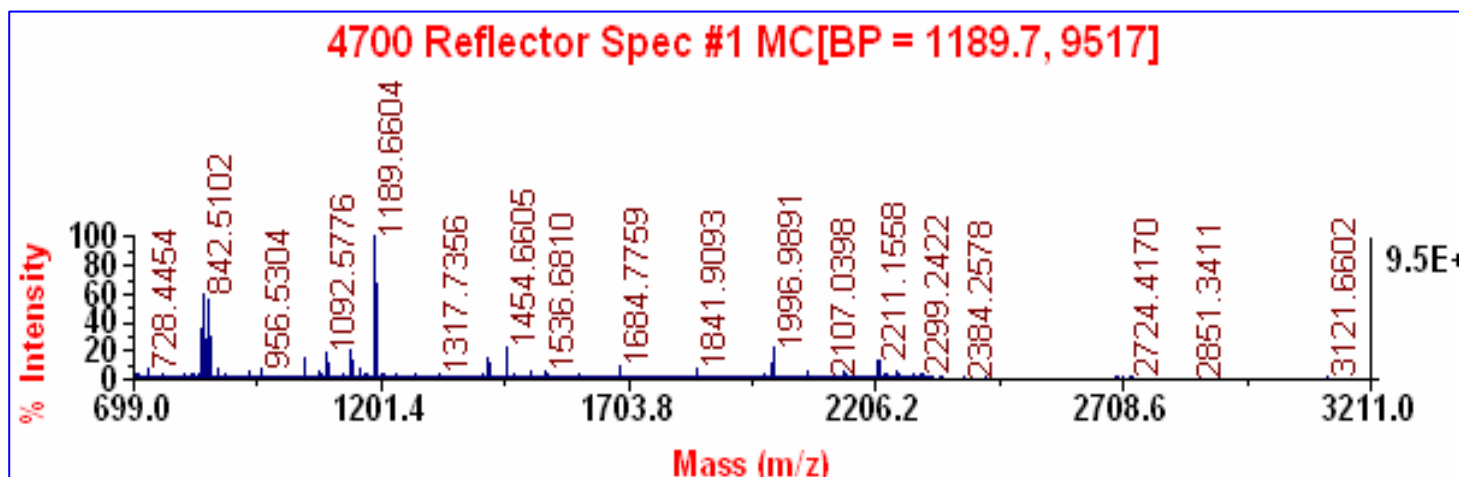

| Calc. Mass | Obsrv.Mass | ± da    | ± ppm | Start Seq. | End Seq. | Sequence      | Ion Score | C. I. % |
|------------|------------|---------|-------|------------|----------|---------------|-----------|---------|
| 728.4777   | 728.4453   | -0.0324 | -44   | 235        | 240      | IAQRLK        |           |         |
| 757.3839   | 757.3898   | 0.0059  | 8     | 442        | 448      | AAVEDPR       |           |         |
| 835.4672   | 835.467    | -0.0002 | 0     | 432        | 438      | EAVTFLR       |           |         |
| 852.5665   | 852.5658   | -0.0007 | -1    | 327        | 334      | GLVVPVIR      |           |         |
| 931.5029   | 931.5099   | 0.007   | 8     | 30         | 38       | SLPGVSLCR     |           |         |
| 1189.6576  | 1189.66    | 0.0024  | 2     | 135        | 145      | VEGGTPLFTLR   | 42        | 98.596  |
| 1189.6576  | 1189.66    | 0.0024  | 2     | 135        | 145      | VEGGTPLFTLR   |           |         |
| 1317.7524  | 1317.7358  | -0.0166 | -13   | 135        | 146      | VEGGTPLFTLRK  |           |         |
| 1389.7849  | 1389.8219  | 0.037   | 27    | 427        | 438      | LIDGREAVTFLR  |           |         |
| 1419.7478  | 1419.748   | 0.0002  | 0     | 314        | 326      | DYIDISVAVATPR | 30        | 78.007  |
| 1419.7478  | 1419.748   | 0.0002  | 0     | 314        | 326      | DYIDISVAVATPR |           |         |

|           |           |         |    |     |                           |           |
|-----------|-----------|---------|----|-----|---------------------------|-----------|
| 1454.6581 | 1454.6604 | 0.0023  | 2  | 335 | 346 NVETMNYADIER          | 38 96.053 |
| 1454.6581 | 1454.6604 | 0.0023  | 2  | 335 | 346 NVETMNYADIER          |           |
| 1470.653  | 1470.6538 | 0.0008  | 1  | 335 | 346 NVETMNYADIER          |           |
| 1979.983  | 1979.9774 | -0.0056 | -3 | 411 | 426 VEVRPMMYVALTYDHR      |           |
| 1995.9779 | 1995.9795 | 0.0016  | 1  | 411 | 426 VEVRPMMYVALTYDHR      |           |
| 2066.0916 | 2066.1436 | 0.052   | 25 | 309 | 326 EVVYRDYIDISVAVATPR    |           |
| 2187.1292 | 2187.1724 | 0.0432  | 20 | 288 | 308 ASAFALQEQPVVNAVIDDATK |           |
| 2248.1091 | 2248.1492 | 0.0401  | 18 | 69  | 89 NDVITVQTPAFAESVTEGDVR  |           |

### MS/MS Fragmentation of VEGGTPLFTLR (1189.66, 1+)

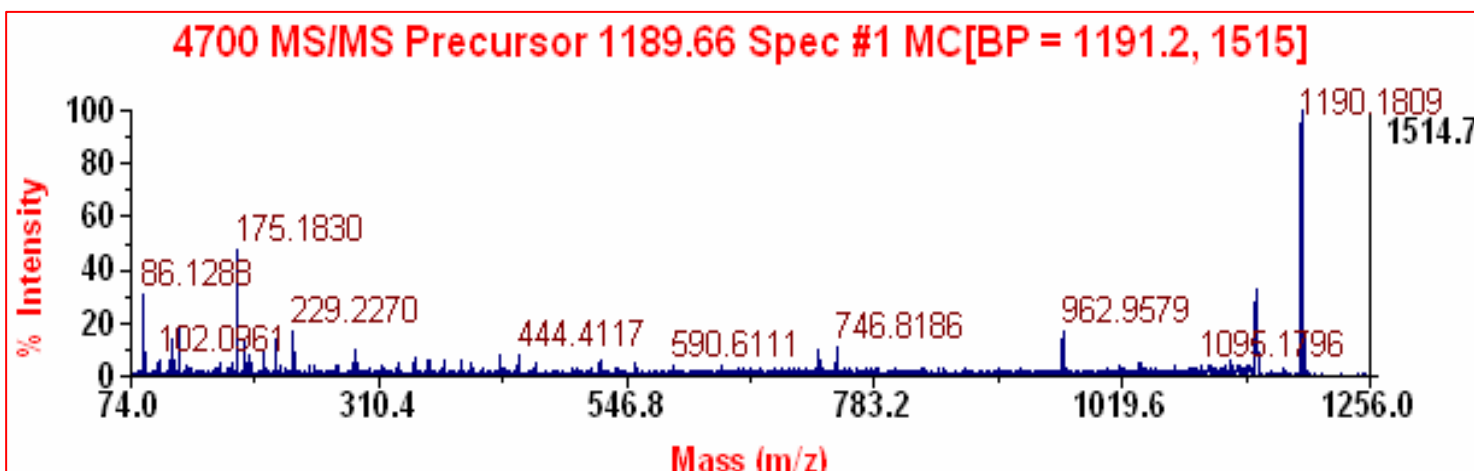

### MS/MS Fragmentation of NVETMNYADIER (1454.6604, 1+)

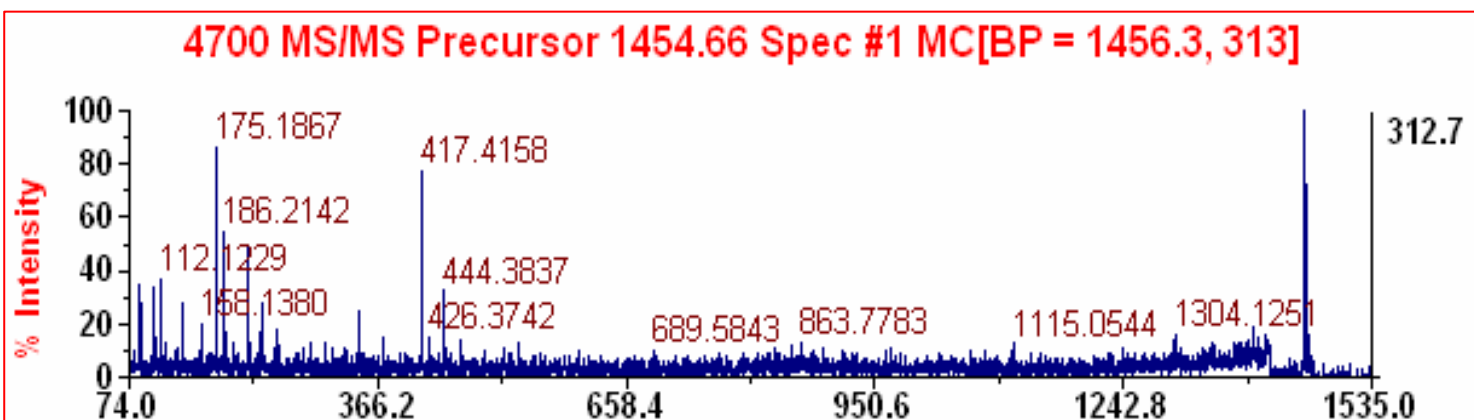

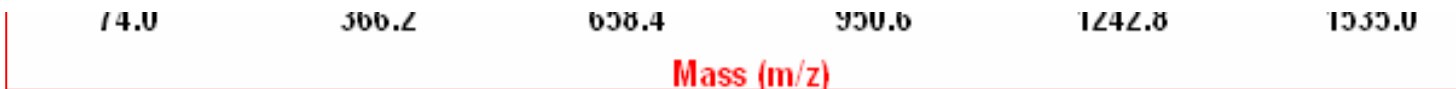

**Spot No.6415**      **gi|148686116**  
 transaldolase 1, isoform CRA\_e [Mus musculus]

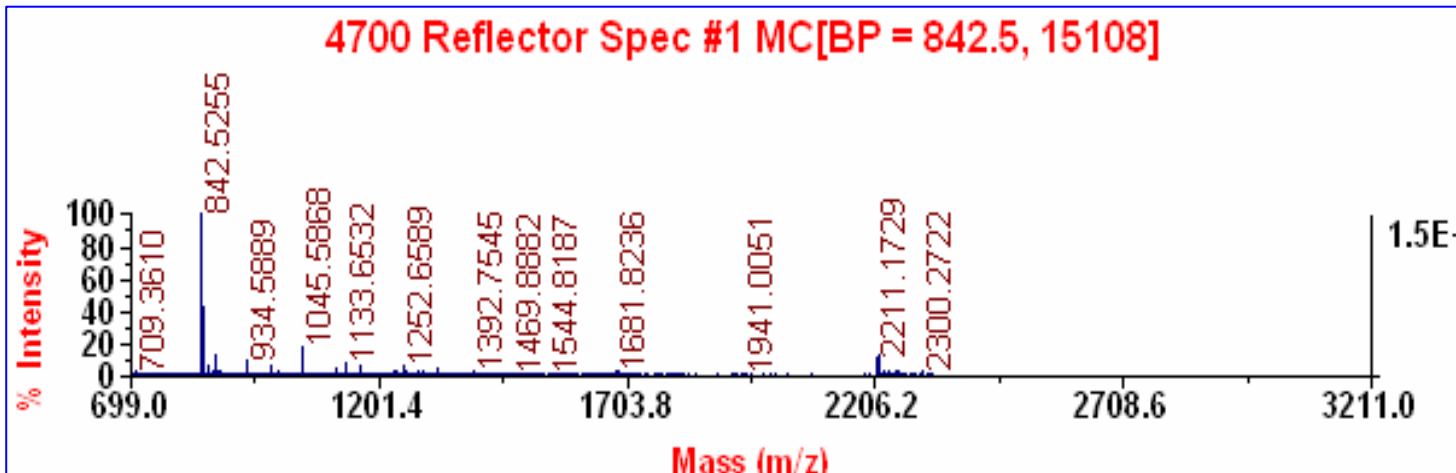

| Calc. Mass | Obsrv.Mass | ± da    | ± ppm | Start | Seq. | End Seq.     | Sequence | Ion Score | C. I. % |
|------------|------------|---------|-------|-------|------|--------------|----------|-----------|---------|
| 785.5131   | 785.525    | 0.0119  | 15    | 205   | 211  | LLGELLK      |          |           |         |
| 863.4297   | 863.4567   | 0.027   | 31    | 166   | 171  | IYNYK        |          |           |         |
| 876.4421   | 876.4656   | 0.0235  | 27    | 49    | 56   | VSTEVDAR     |          |           |         |
| 934.572    | 934.5889   | 0.0169  | 18    | 70    | 76   | RLIELYK      |          |           |         |
| 934.572    | 934.5889   | 0.0169  | 18    | 70    | 76   | RLIELYK      |          |           |         |
| 981.5186   | 981.5409   | 0.0223  | 23    | 177   | 185  | TIVMGASFR    | 9        | 0         |         |
| 981.5186   | 981.5409   | 0.0223  | 23    | 177   | 185  | TIVMGASFR    |          |           |         |
| 997.5135   | 997.5303   | 0.0168  | 17    | 177   | 185  | TIVMGASFR    |          |           |         |
| 1133.6313  | 1133.6521  | 0.0208  | 18    | 261   | 270  | FAADAIKLER   | 23       | 0         |         |
| 1133.6313  | 1133.6521  | 0.0208  | 18    | 261   | 270  | FAADAIKLER   |          |           |         |
| 1242.7052  | 1242.6991  | -0.0061 | -5    | 212   | 223  | DNSKLAPALSVK |          |           |         |
| 1252.6355  | 1252.6576  | 0.0221  | 18    | 57    | 67   | LSFDKDAMVAR  | 18       | 0         |         |
| 1252.6355  | 1252.6576  | 0.0221  | 18    | 57    | 67   | LSFDKDAMVAR  |          |           |         |
| 1276.6532  | 1276.6569  | 0.0037  | 3     | 89    | 100  | LSSTWEGIQAGK |          |           |         |
| 1311.6692  | 1311.7523  | 0.0831  | 63    | 139   | 149  | ILDWHVANTDK  |          |           |         |
| 1439.7642  | 1439.7778  | 0.0136  | 9     | 139   | 150  | ILDWHVANTDKK |          |           |         |

**MS/MS Fragmentation of FAADAIKLER (1133.6521, 1+)**

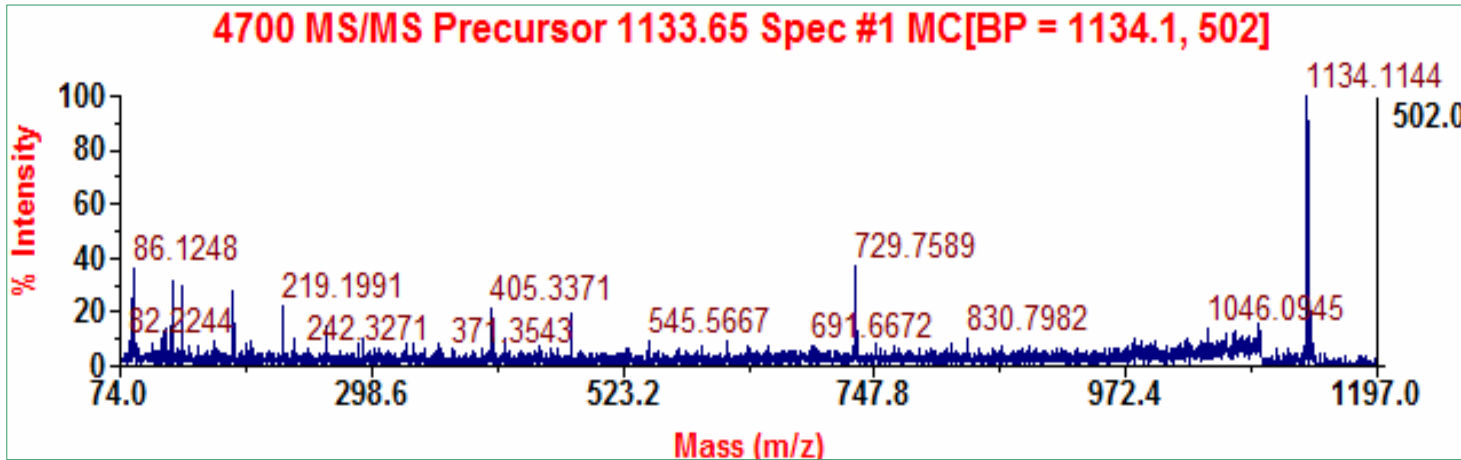

**Spot No.6574**

**gi|70794816**

Hypothetical protein LOC433182 [Mus musculus]

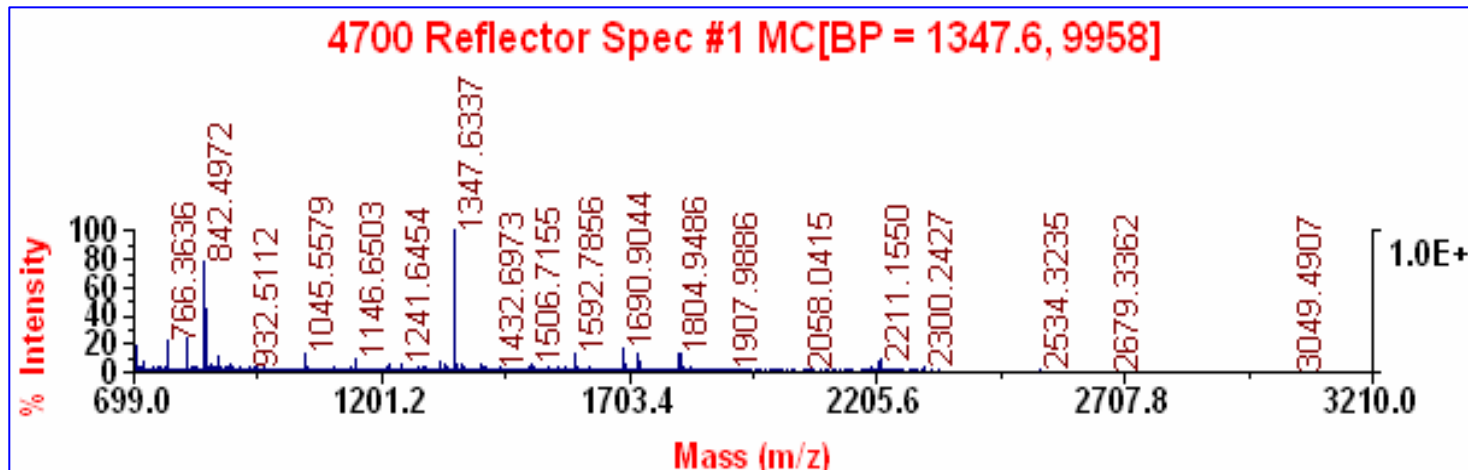

| Calc. Mass | Obsrv. Mass | ± da   | ± ppm | Start | Seq. | End Seq. | Sequence | Ion Score | C. I. % |
|------------|-------------|--------|-------|-------|------|----------|----------|-----------|---------|
| 704.4089   | 704.4256    | 0.0167 | 24    | 127   | 132  |          | GVPLYR   |           |         |



|                 |                  |               |          |           |                             |                 |
|-----------------|------------------|---------------|----------|-----------|-----------------------------|-----------------|
| 766.3729        | 766.3636         | #####         | -12      | 10        | 15 EIFDSR                   |                 |
| 806.4519        | 806.44           | #####         | -15      | 407       | 412 YNQILR                  |                 |
| 932.5312        | 932.5112         | -0.02         | -21      | 427       | 434 SFRNPLAK                |                 |
| 1439.7417       | 1439.7354        | #####         | -4       | 270       | 281 YITPDQLADLYK            |                 |
| 1557.759        | 1557.8121        | 0.0531        | 34       | 359       | 372 LAQSNWGVMSVSR           |                 |
| <b>1804.944</b> | <b>1804.9489</b> | <b>0.0049</b> | <b>3</b> | <b>33</b> | <b>50 AAVPSGASTGIYEALER</b> | <b>49 #####</b> |
| 1804.944        | 1804.9489        | 0.0049        | 3        | 33        | 50 AAVPSGASTGIYEALER        |                 |
| 2192.0327       | 2192.0659        | 0.0332        | 15       | 234       | 253 AGYTDQVVIGMDVAASEFYR    | 30 #####        |
| 2192.0327       | 2192.0659        | 0.0332        | 15       | 234       | 253 AGYTDQVVIGMDVAASEFYR    |                 |
| 2208.0278       | 2208.0671        | 0.0393        | 18       | 234       | 253 AGYTDQVVIGMDVAASEFYR    |                 |
| 2277.1357       | 2277.1111        | #####         | -11      | 33        | 54 AAVPSGASTGIYEALERDNDK    |                 |

**MS/MS Fragmentation of AAVPSGASTGIYEALER (1804.9489, 1+)**

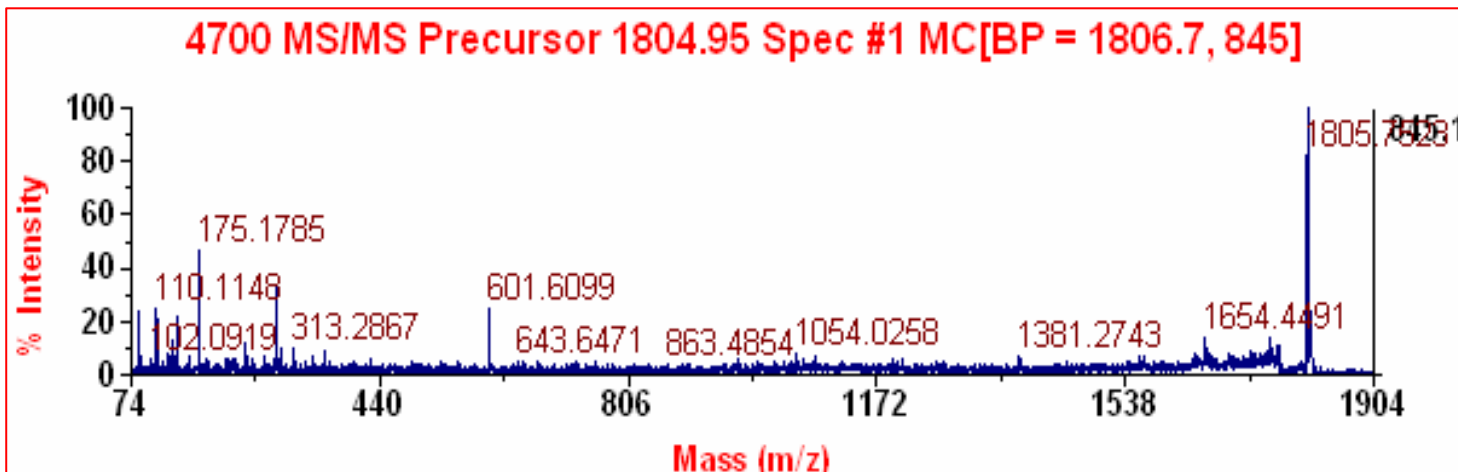

**Spot No.8657**

**gi|148677504**

ATP synthase, H<sup>+</sup> transporting, mitochondrial F1 complex, alpha subunit, isoform 1, isoform CRA\_h

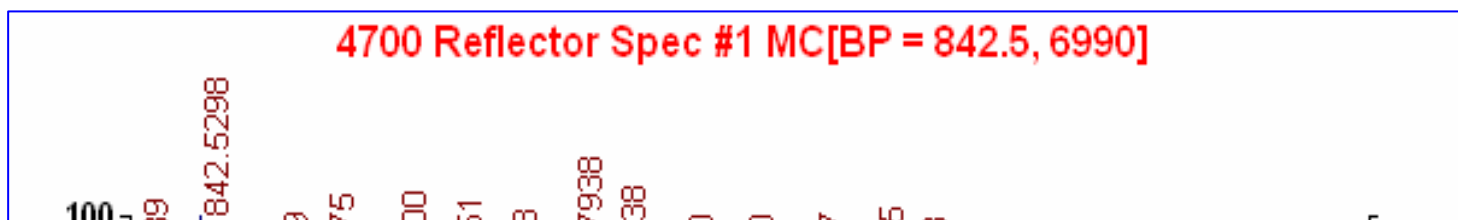

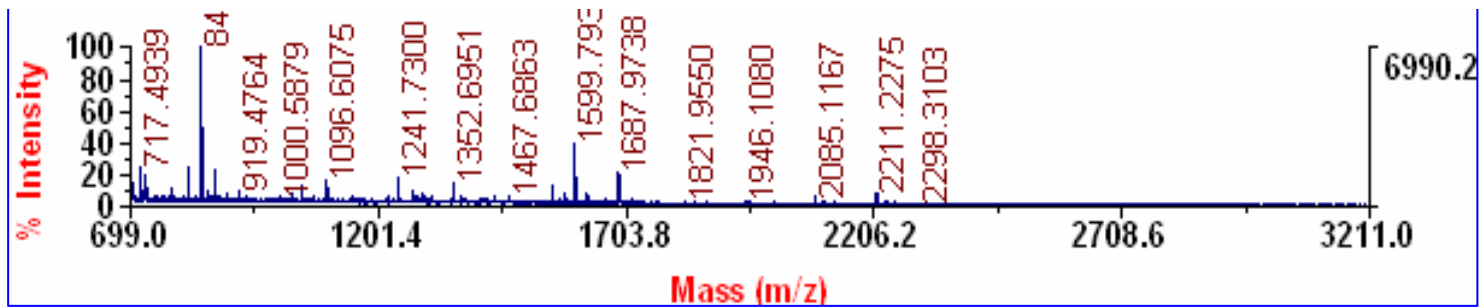

| Calc. Mass | Obsrv.Mass | ± da    | ± ppm | Start | Seq. | End Seq. | Sequence         | Ion Score | C. I. % |
|------------|------------|---------|-------|-------|------|----------|------------------|-----------|---------|
| 723.4511   | 723.4763   | 0.0252  | 35    | 129   | 135  |          | APGIIPR          |           |         |
| 730.457    | 730.4213   | -0.0357 | -49   | 17    | 23   |          | RAGLVSK          |           |         |
| 815.4733   | 815.5284   | 0.0551  | 68    | 115   | 122  |          | GPIGSKTR         |           |         |
| 860.5022   | 860.5187   | 0.0165  | 19    | 276   | 282  |          | QMSLLLR          |           |         |
| 876.4971   | 876.5211   | 0.024   | 27    | 276   | 282  |          | QMSLLLR          |           |         |
| 892.4886   | 892.5123   | 0.0237  | 27    | 388   | 394  |          | LELAQYR          |           |         |
| 919.4553   | 919.4764   | 0.0211  | 23    | 140   | 147  |          | EPMQTGIK         |           |         |
| 1026.5942  | 1026.6212  | 0.027   | 26    | 148   | 157  |          | AVDSLVPIGR       |           |         |
| 1094.6793  | 1094.5911  | -0.0882 | -81   | 6     | 16   |          | VAAAVARALPR      |           |         |
| 1096.549   | 1096.6069  | 0.0579  | 53    | 378   | 387  |          | AMKQVAGTMK       |           |         |
| 1306.6749  | 1306.6991  | 0.0242  | 19    | 24    | 36   |          | NALGSSFVDGIAR    |           |         |
| 1553.7383  | 1553.7957  | 0.0574  | 37    | 288   | 300  |          | EAYPGDVFYLHSR    | 12        | 0       |
| 1553.7383  | 1553.7957  | 0.0574  | 37    | 288   | 300  |          | EAYPGDVFYLHSR    |           |         |
| 1577.8573  | 1577.8484  | -0.0089 | -6    | 493   | 506  |          | LKEIVTNFLAGFEP   |           |         |
| 1624.8904  | 1624.9558  | 0.0654  | 40    | 87    | 102  |          | TGAIVDVPVGEELLGR | 24        | 0       |
| 1624.8904  | 1624.9558  | 0.0654  | 40    | 87    | 102  |          | TGAIVDVPVGEELLGR |           |         |

### MS/MS Fragmentation of TGAIVDVPVGEELLGR (1624.9558, 1+)

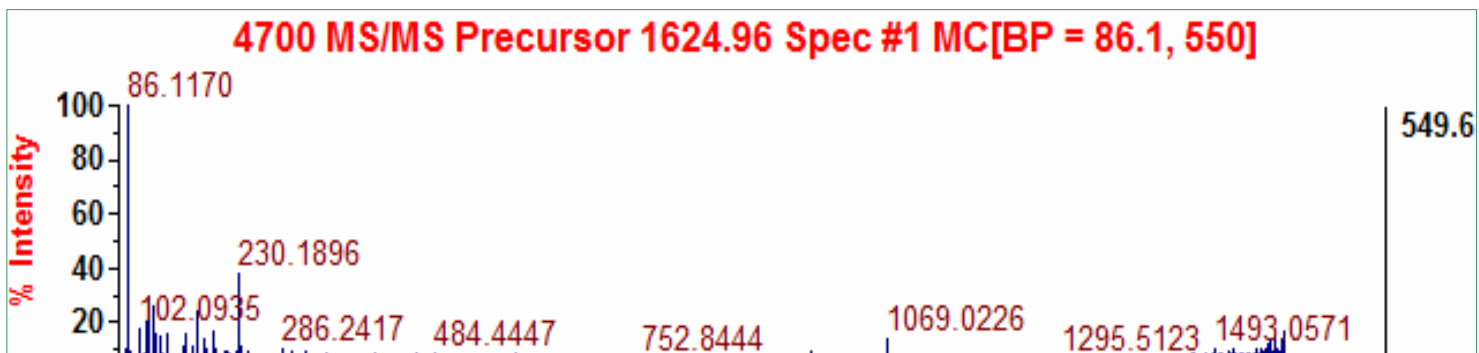

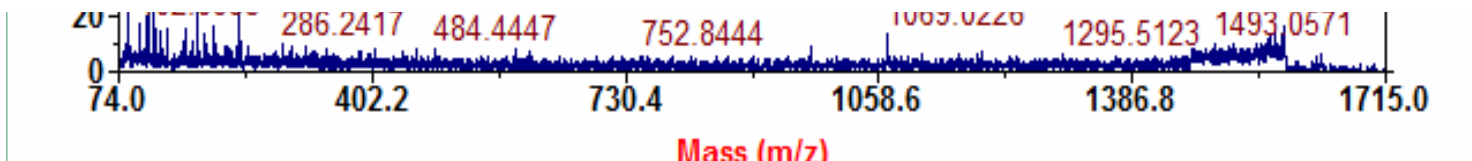

Spot No.6477 **gi|228480253**

Septin 2 b [Mus musculus]

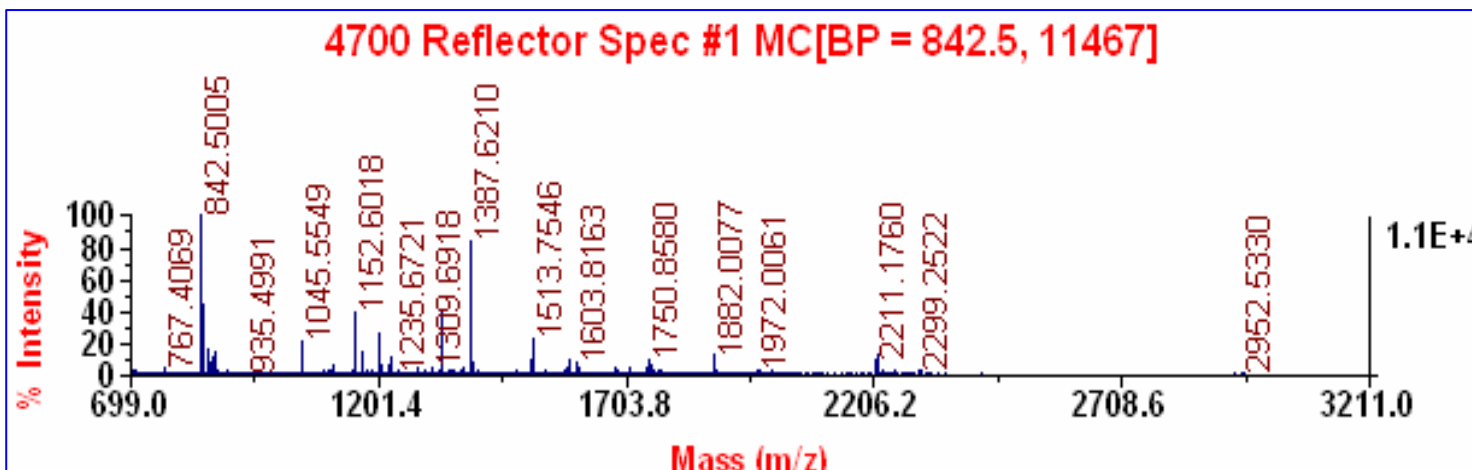

| Calc. Mass | Obsrv.Mass | ± da    | ± ppm | Start | Seq. | End Seq. | Sequence          | Ion Score | C. I. % |
|------------|------------|---------|-------|-------|------|----------|-------------------|-----------|---------|
| 767.4158   | 767.4069   | -0.0089 | -12   | 100   |      | 105      | HIIDNR            |           |         |
| 773.4264   | 773.3781   | -0.0483 | -62   | 286   |      | 291      | EALRR             |           |         |
| 978.4196   | 978.4753   | 0.0557  | 57    | 271   |      | 278      | VENEDMNK          |           |         |
| 1203.5753  | 1203.5677  | -0.0076 | -6    | 89    |      | 98       | YLHDESGLNR        | 32        | 86.608  |
| 1203.5753  | 1203.5677  | -0.0076 | -6    | 89    |      | 98       | YLHDESGLNR        |           |         |
| 1325.6947  | 1325.6788  | -0.0159 | -12   | 159   |      | 169      | ILDEIEEHSIK       |           |         |
| 1359.6764  | 1359.6653  | -0.0111 | -8    | 89    |      | 99       | YLHDESGLNRR       |           |         |
| 1481.7958  | 1481.7928  | -0.003  | -2    | 158   |      | 169      | RILDEIEEHSIK      |           |         |
| 1513.7533  | 1513.7528  | -0.0005 | 0     | 77    |      | 88       | TIISYIDEQFER      | 41        | 98.271  |
| 1513.7533  | 1513.7528  | -0.0005 | 0     | 77    |      | 88       | TIISYIDEQFER      |           |         |
| 1603.8174  | 1603.8159  | -0.0015 | -1    | 38    |      | 51       | TVQIEASTVEIEER    |           |         |
| 1759.9589  | 1759.9924  | 0.0335  | 19    | 193   |      | 209      | ASIPFSVVGSNQLIEAK |           |         |
| 1881.9956  | 1882.0082  | 0.0126  | 7     | 11    |      | 26       | STLINSFLTDLYPER   | 51        | 99.829  |
| 1881.9956  | 1882.0082  | 0.0126  | 7     | 11    |      | 26       | STLINSFLTDLYPER   |           |         |

**MS/MS Fragmentation of TIISYIDEQFER (1513.7528, 1+)**

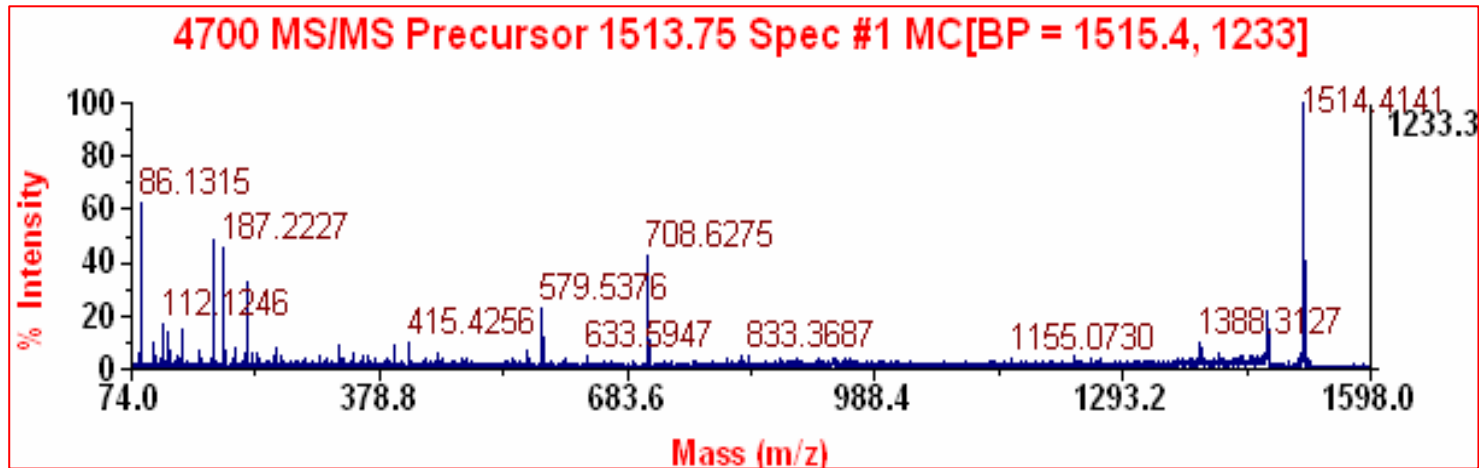

**MS/MS Fragmentation of STLINSLFLTDLYPER (1882.0082, 1+)**

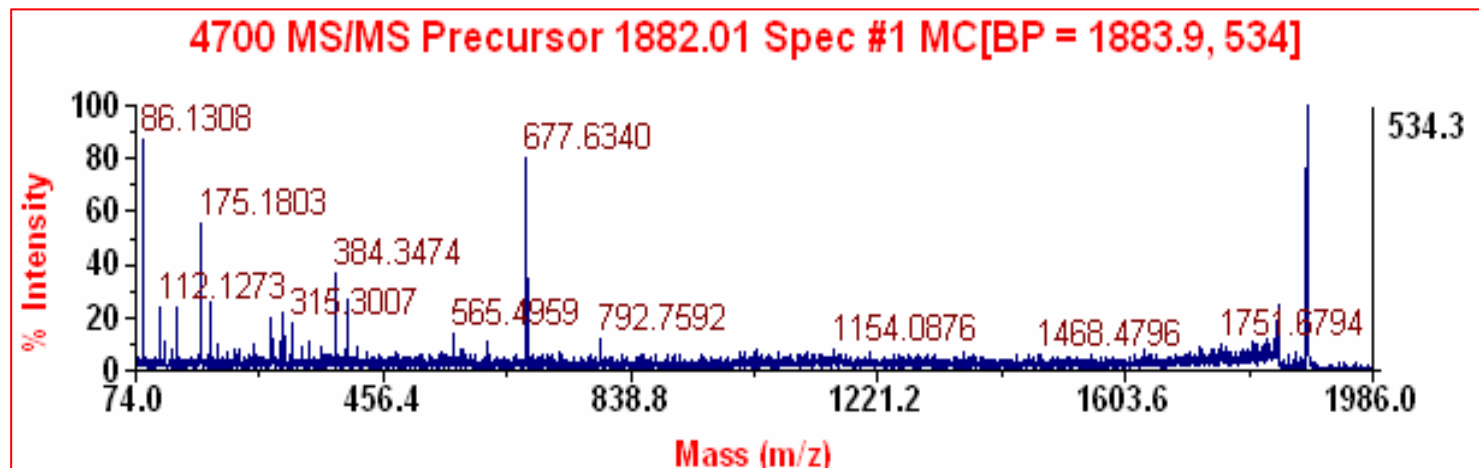

**Spot No.5454**

**gi|52696229**

Chain A, Crystal Structure Of Mrna Decapping Enzyme(Dcps) From Mus Musculus At 1.83 A Resol

**4700 Reflector Spec #1 MC[BP = 842.5, 11533]**

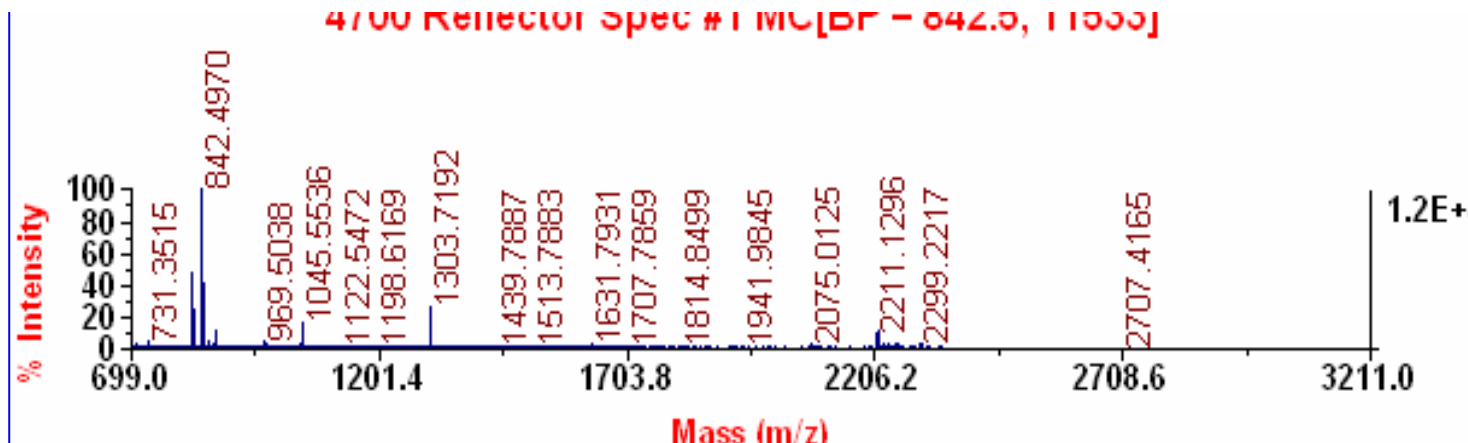

| Calc. Mass | Obsrv.Mass | ± da    | ± ppm | Start | Seq. | End Seq. | Sequence              | Ion Score | C. I. % |
|------------|------------|---------|-------|-------|------|----------|-----------------------|-----------|---------|
| 731.3583   | 731.3515   | -0.0068 | -9    | 322   | 326  |          | HYQQR                 |           |         |
| 821.4879   | 821.4748   | -0.0131 | -16   | 327   | 333  |          | TLTFALR               |           |         |
| 823.446    | 823.4343   | -0.0117 | -14   | 53    | 59   |          | LPFSGFR               |           |         |
| 1043.5844  | 1043.5535  | -0.0309 | -30   | 258   | 266  |          | EGQEAILKR             |           |         |
| 1283.7206  | 1283.6982  | -0.0224 | -17   | 334   | 344  |          | TDDPLLQLLQK           |           |         |
| 1303.7369  | 1303.7191  | -0.0178 | -14   | 243   | 253  |          | DLTPEHLPLLR           | 33        | 88.082  |
| 1303.7369  | 1303.7191  | -0.0178 | -14   | 243   | 253  |          | DLTPEHLPLLR           |           |         |
| 1659.9541  | 1659.9103  | -0.0438 | -26   | 240   | 253  |          | SLRDLTPEHLPLLR        |           |         |
| 1800.0491  | 1799.9492  | -0.0999 | -55   | 243   | 257  |          | DLTPEHLPLLRNILR       |           |         |
| 2075.0232  | 2075.0105  | -0.0127 | -6    | 117   | 133  |          | LQFSNDIYSTYNLFPPR     | 14        | 0       |
| 2075.0232  | 2075.0105  | -0.0127 | -6    | 117   | 133  |          | LQFSNDIYSTYNLFPPR     |           |         |
| 2094.123   | 2094.0967  | -0.0263 | -13   | 98    | 116  |          | TPFQVEHVAQLLTGSPELK   |           |         |
| 2313.1055  | 2313.2239  | 0.1184  | 51    | 2     | 21   |          | GSDKIHHHHHMHMADTAPQLK |           |         |

### MS/MS Fragmentation of DLTPEHLPLLR (1303.7191, 1+)

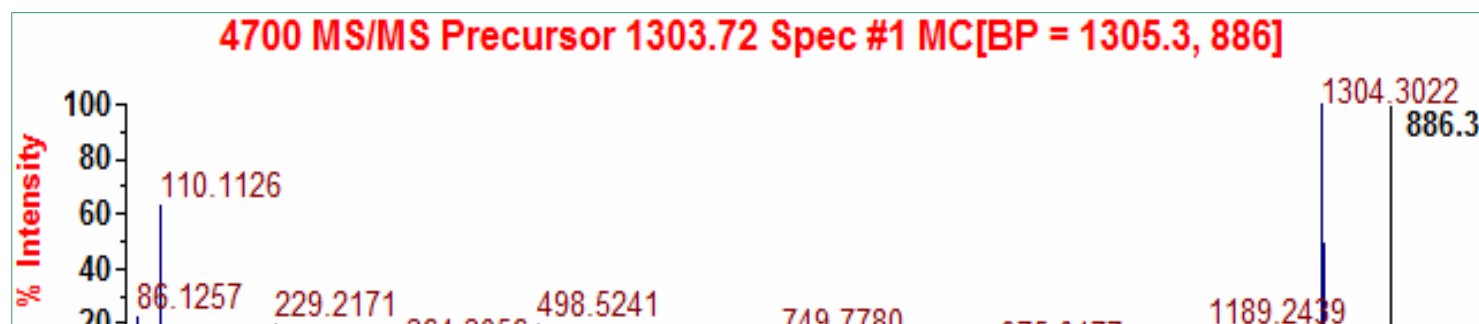

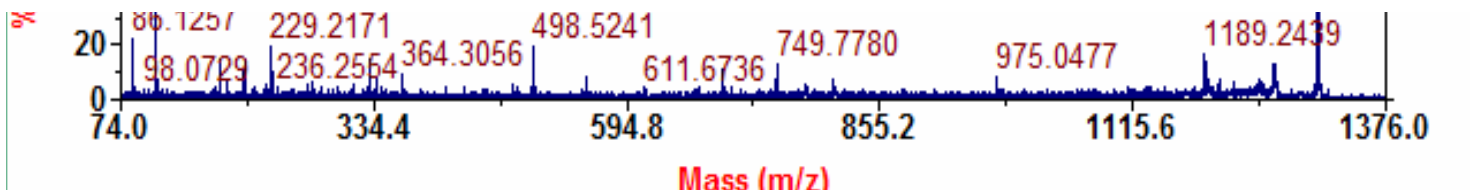

Spot No.7328

gi|81917948

Heterogeneous nuclear ribonucleoprotein D-like [Mus musculus]

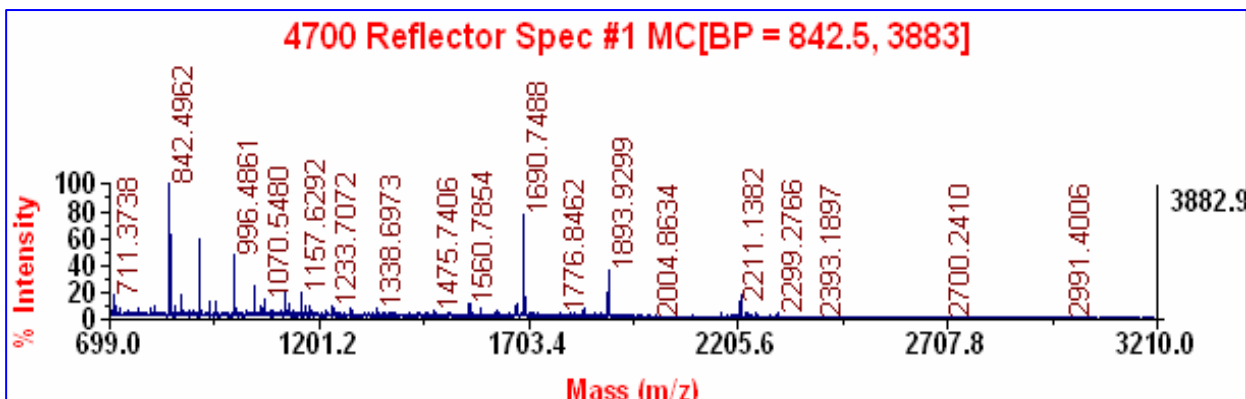

| Calc. Mass | Obsrv.Mass | ± da    | ± ppm | Start | Seq. | End Seq.          | Sequence | Ion Score | C. I. % |
|------------|------------|---------|-------|-------|------|-------------------|----------|-----------|---------|
| 745.3839   | 745.383    | -0.0009 | -1    | 62    | 68   | TDPVTGR           |          |           |         |
| 889.4526   | 889.4468   | -0.0058 | -7    | 176   | 183  | YHQIGSGK          |          |           |         |
| 914.5134   | 914.4954   | -0.018  | -20   | 71    | 78   | GFGFVLFK          | 32       | 86.402    |         |
| 914.5134   | 914.4954   | -0.018  | -20   | 71    | 78   | GFGFVLFK          |          |           |         |
| 996.4996   | 996.4861   | -0.0135 | -14   | 44    | 51   | DLTEYLSR          | 30       | 79.036    |         |
| 996.4996   | 996.4861   | -0.0135 | -14   | 44    | 51   | DLTEYLSR          |          |           |         |
| 1089.6051  | 1089.5742  | -0.0309 | -28   | 188   | 196  | VAQPKEVYR         |          |           |         |
| 1110.5499  | 1110.5188  | -0.0311 | -28   | 52    | 61   | FGEVVDCTIK        |          |           |         |
| 1157.6466  | 1157.6273  | -0.0193 | -17   | 69    | 78   | SRGFGFVLFK        |          |           |         |
| 1462.7397  | 1462.7214  | -0.0183 | -13   | 193   | 203  | EYRQQQQQQK        |          |           |         |
| 1705.8643  | 1705.8495  | -0.0148 | -9    | 116   | 131  | VFVGGLSPDTSEEQIK  |          |           |         |
| 1776.8513  | 1776.8466  | -0.0047 | -3    | 156   | 170  | GFCFITYTDEEPVKK   |          |           |         |
| 1833.9592  | 1833.882   | -0.0772 | -42   | 115   | 131  | KVFGGLSPDTSEEQIK  |          |           |         |
| 1836.916   | 1836.8979  | -0.0181 | -10   | 52    | 68   | FGEVVDCTIKTDPVTGR |          |           |         |

MS/MS Fragmentation of **GFGFVLFK (914.4954, 1+)**

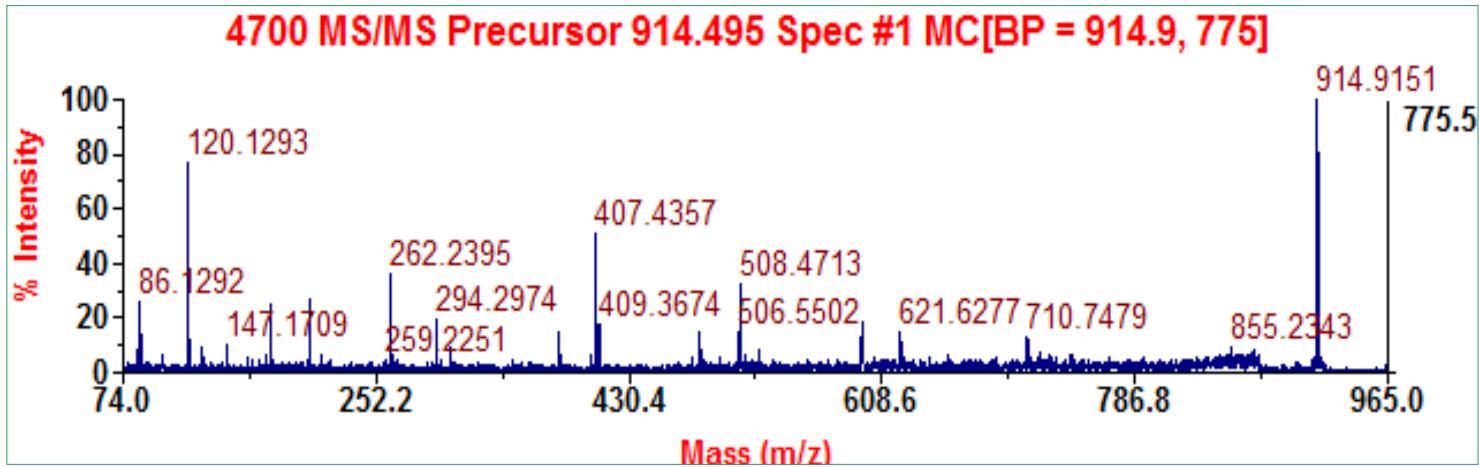

**MS/MS Fragmentation of DLTEYLSR (996.4861, 1+)**

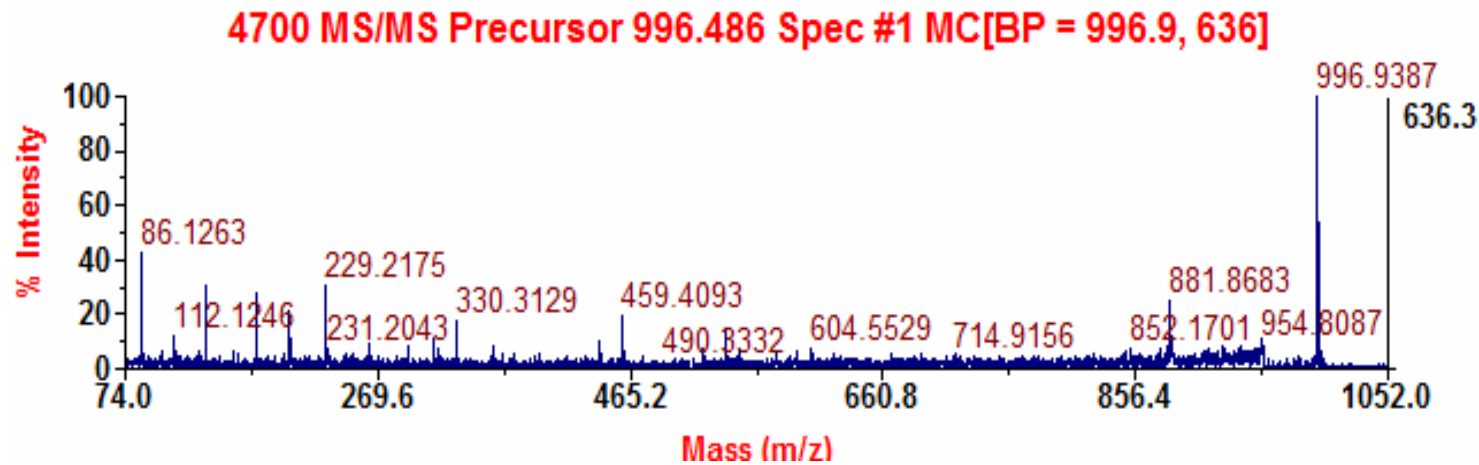

**Spot No.2155**      **gi|123295280**  
 SET translocation [Mus musculus]

**4700 Reflector Spec #1 MC[BP = 1063.6, 9933]**

219

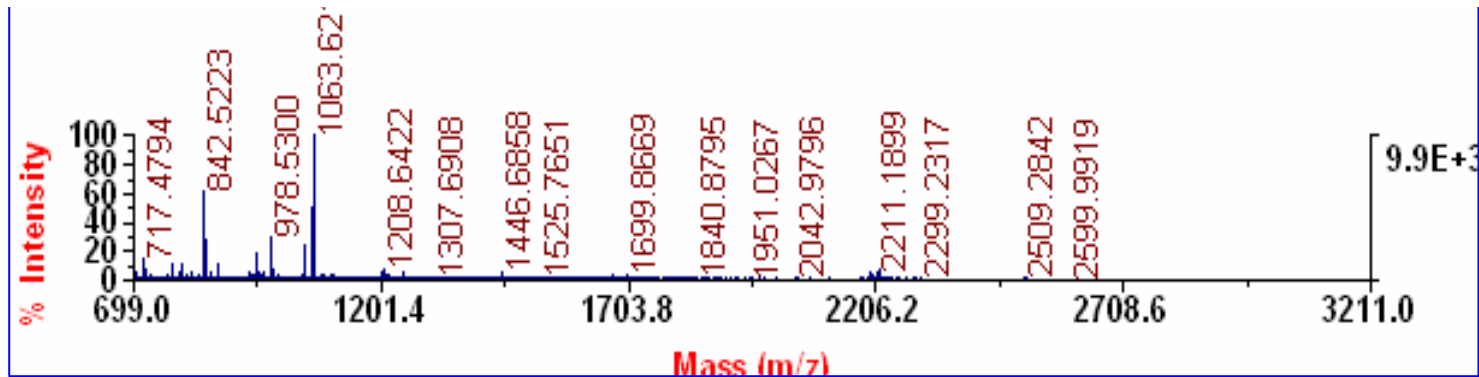

| Calc. Mass | Obsrv. Mass | ± da    | ± ppm | Start | Seq. | End Seq. | Sequence             | Ion Score | C. I. % |
|------------|-------------|---------|-------|-------|------|----------|----------------------|-----------|---------|
| 794.4195   | 794.4289    | 0.0094  | 12    | 77    | 82   | 82       | QPFFQK               |           |         |
| 816.4937   | 816.4398    | -0.0539 | -66   | 83    | 89   | 89       | RSELIK               |           |         |
| 935.5785   | 935.5252    | -0.0533 | -57   | 15    | 23   | 23       | KPRPAAAPK            |           |         |
| 948.4857   | 948.4987    | 0.013   | 14    | 181   | 188  | 188      | RSSQTQNK             |           |         |
| 1063.6047  | 1063.6218   | 0.0171  | 16    | 75    | 82   | 82       | LRQPFFQK             | 17        | 0       |
| 1063.6047  | 1063.6218   | 0.0171  | 16    | 75    | 82   | 82       | LRQPFFQK             |           |         |
| 1208.6045  | 1208.6416   | 0.0371  | 31    | 122   | 131  | 131      | VEVTEFEDIK           |           |         |
| 1446.6495  | 1446.6864   | 0.0369  | 26    | 154   | 166  | 166      | EFHLESNDPSSK         |           |         |
| 1671.8224  | 1671.8698   | 0.0474  | 28    | 122   | 135  | 135      | VEVTEFEDIKSGYR       |           |         |
| 1757.928   | 1758.0021   | 0.0741  | 42    | 57    | 71   | 71       | LNEQASEEILKVEQK      |           |         |
| 1840.8064  | 1840.8784   | 0.072   | 39    | 136   | 149  | 149      | IDFYFDENPYFENK       |           |         |
| 2195.021   | 2195.0999   | 0.0789  | 36    | 39    | 56   | 56       | EQQEAIHIDEVQNEIDR    | 24        | 0       |
| 2195.021   | 2195.0999   | 0.0789  | 36    | 39    | 56   | 56       | EQQEAIHIDEVQNEIDR    |           |         |
| 2509.1802  | 2509.2856   | 0.1054  | 42    | 36    | 56   | 56       | GIDERKEQQEAIHIDEVQNE |           |         |

### MS/MS Fragmentation of EQQEAIHIDEVQNEIDR (2195.0999, 1+)

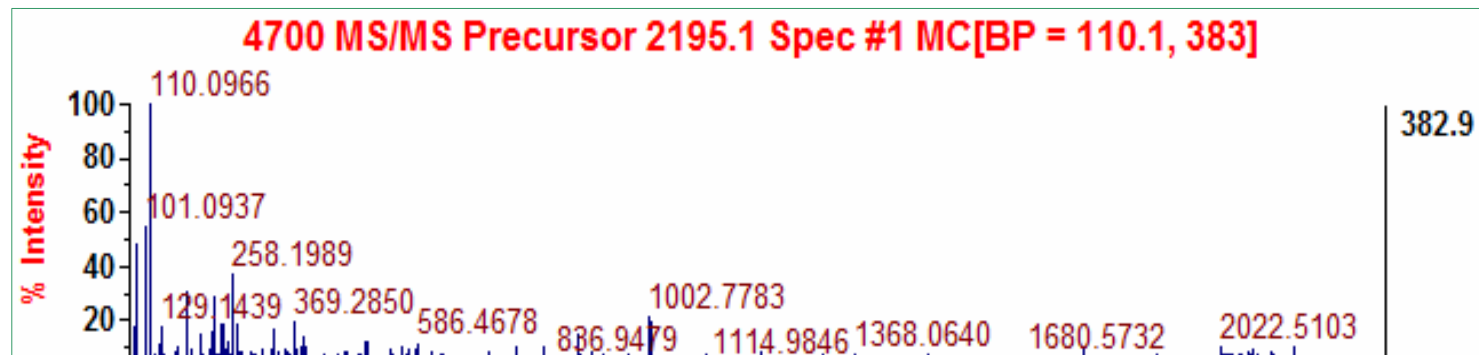



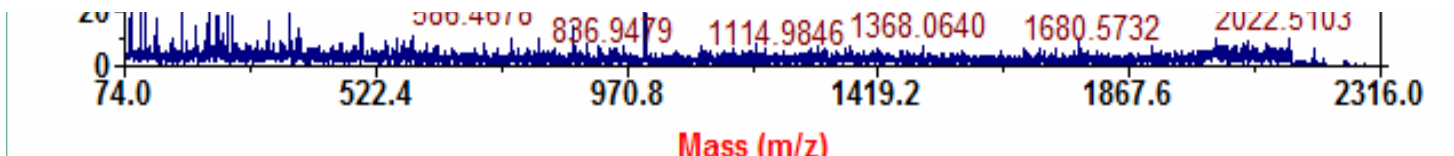

**Spot No.2381**      **gi|50510319**  
 mKIAA0002 protein [Mus musculus]

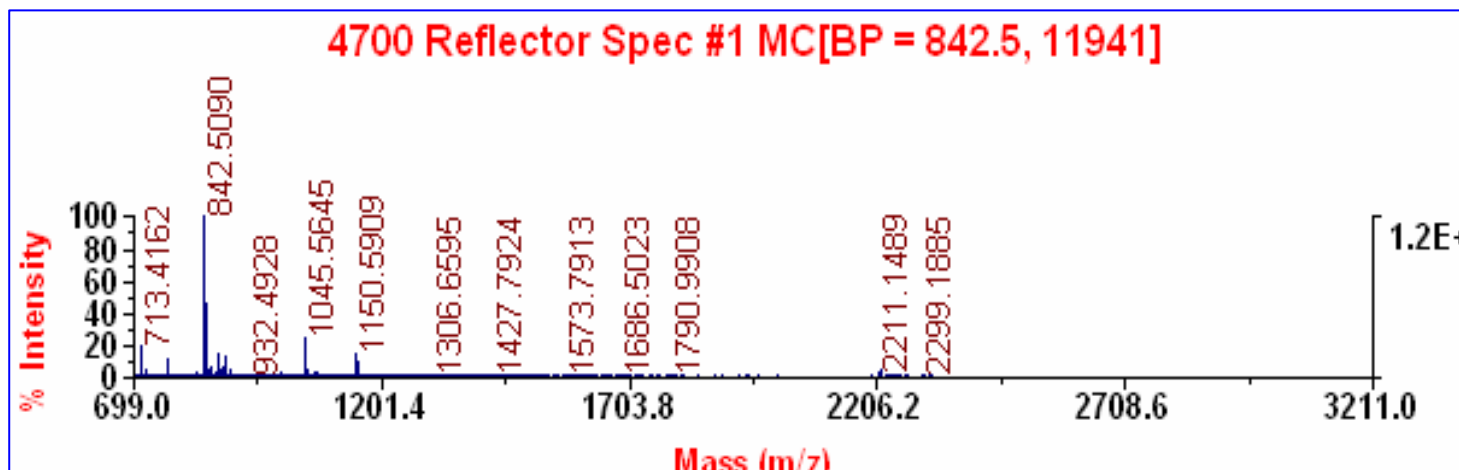

| Calc. Mass | Obsrv.Mass | ± da    | ± ppm | Start | Seq. | End Seq. | Sequence             | Ion Score | C. I. % |
|------------|------------|---------|-------|-------|------|----------|----------------------|-----------|---------|
| 882.4866   | 882.5624   | 0.0758  | 86    | 7     | 14   |          | AMALHVPK             |           |         |
| 1128.6736  | 1128.6497  | -0.0239 | -21   | 517   | 527  |          | LATNAAVTVLR          |           |         |
| 1150.5891  | 1150.5905  | 0.0014  | 1     | 448   | 457  |          | FAEAFEAI PR          | 32        | 69.54   |
| 1150.5891  | 1150.5905  | 0.0014  | 1     | 448   | 457  |          | FAEAFEAI PR          |           |         |
| 1278.6841  | 1278.6866  | 0.0025  | 2     | 447   | 457  |          | KFAEAFEAI PR         |           |         |
| 1681.8148  | 1681.7928  | -0.022  | -13   | 52    | 66   |          | TAYGPNGMNMVINR       |           |         |
| 2225.1821  | 2225.1775  | -0.0046 | -2    | 211   | 231  |          | VCKILGSGIYSSVLHGMVFK |           |         |

**MS/MS Fragmentation of FAEAFEAI PR (1150.5905, 1+)**

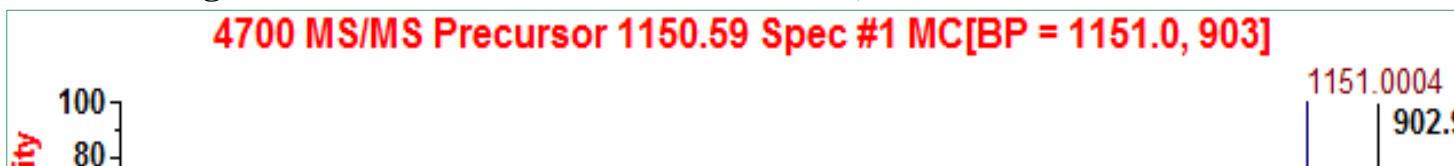

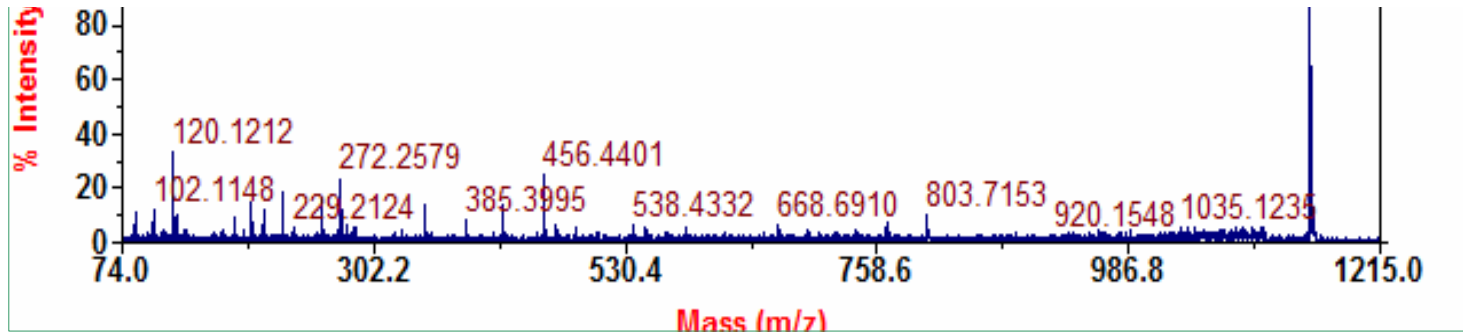

Spot No.4255                      gi|13752262  
 HSP90 [grapevine leafroll-associated virus 5]

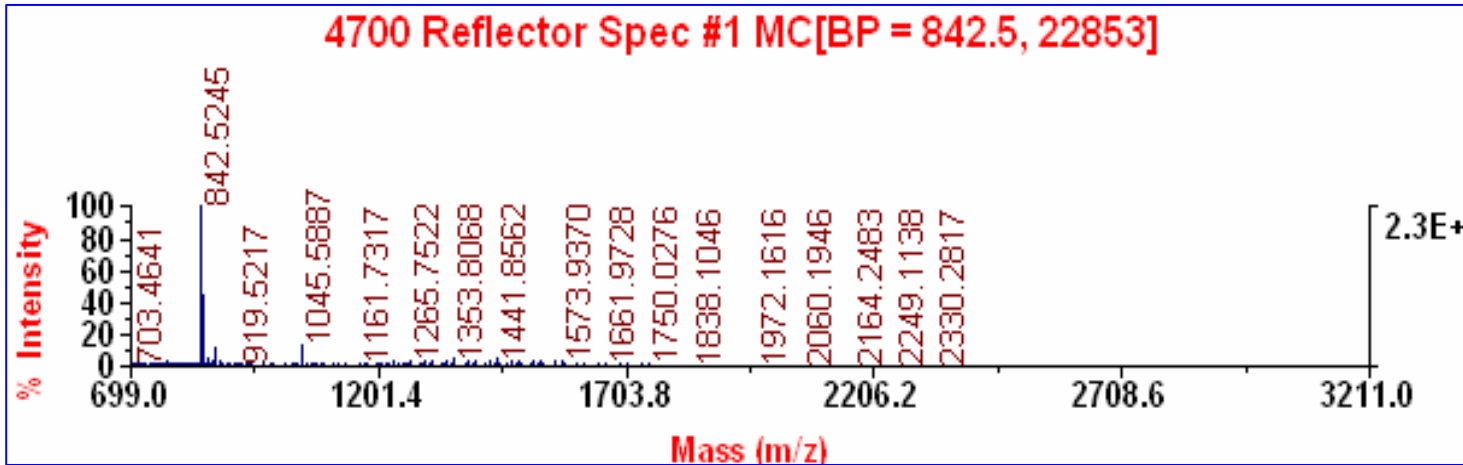

| Calc. Mass | Obsrv.Mass | ± da    | ± ppm | Start | Seq. | End Seq. | Sequence     | Ion Score | C. I. % |
|------------|------------|---------|-------|-------|------|----------|--------------|-----------|---------|
| 703.3984   | 703.4645   | 0.0661  | 94    | 142   | 147  | 147      | VEAEKK       |           |         |
| 737.394    | 737.3932   | -0.0008 | -1    | 47    | 53   | 53       | FS AISGR     |           |         |
| 800.4988   | 800.5008   | 0.002   | 2     | 209   | 215  | 215      | LATLNLR      |           |         |
| 880.5039   | 880.4903   | -0.0136 | -15   | 135   | 141  | 141      | FPFKVSR      |           |         |
| 983.636    | 983.5814   | -0.0546 | -56   | 359   | 367  | 367      | KLVGALLNR    |           |         |
| 1045.5889  | 1045.5872  | -0.0017 | -2    | 125   | 134  | 134      | VGKPV TETSK  |           |         |
| 1199.6089  | 1199.6869  | 0.078   | 65    | 1     | 11   | 11       | MAL SATSTYVR |           |         |
| 1215.6039  | 1215.6503  | 0.0464  | 38    | 1     | 11   | 11       | MAL SATSTYVR |           |         |
| 1252.6605  | 1252.7804  | 0.1199  | 96    | 403   | 412  | 412      | LDYMIKNEVK   |           |         |

|           |           |         |     |     |                          |
|-----------|-----------|---------|-----|-----|--------------------------|
| 1353.6719 | 1353.8064 | 0.1345  | 99  | 109 | 121 SAVATPMSVFTDK        |
| 1353.6719 | 1353.8064 | 0.1345  | 99  | 109 | 121 SAVATPMSVFTDK        |
| 1391.7423 | 1391.757  | 0.0147  | 11  | 335 | 347 NTTGGLLMRIGSR        |
| 1463.7853 | 1463.8678 | 0.0825  | 56  | 12  | 24 VSKSDEGFVLLR          |
| 1479.759  | 1479.8146 | 0.0556  | 38  | 220 | 232 QGDPVEGVFFKTR        |
| 1513.8043 | 1513.9304 | 0.1261  | 83  | 1   | 14 MALSATSTYVRVSK        |
| 1529.7992 | 1529.9098 | 0.1106  | 72  | 1   | 14 MALSATSTYVRVSK        |
| 1661.8341 | 1661.9713 | 0.1372  | 83  | 192 | 207 GSLLLDVGS DVTSNER    |
| 1749.8741 | 1750.0256 | 0.1515  | 87  | 157 | 171 HTQDLIFCIGNYLGR      |
| 2249.166  | 2249.1121 | -0.0539 | -24 | 302 | 322 EDIDLDAALSSGTLKGEVFR |

Spot No.7466

gi|6753320

Chaperonin containing Tcp1, subunit 3 (gamma) [Mus musculus]

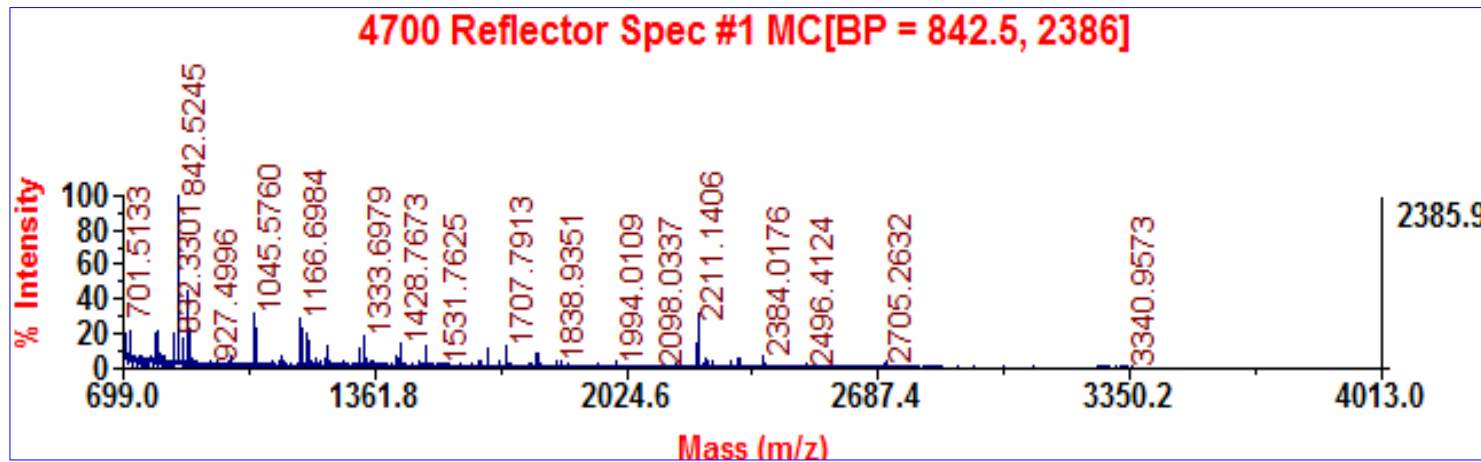

| Calc. Mass | Obsrv.Mass | ± da    | ± ppm | Start  | Seq. | End Seq. | Sequence     | Ion Score | C. I. % |
|------------|------------|---------|-------|--------|------|----------|--------------|-----------|---------|
| 832.391    | 832.33     | -0.0607 | -73   | 529.00 |      | 535      | KGDDQNR      |           |         |
| 1166.689   | 1166.699   | 0.0098  | 8     | 439.00 |      | 449      | AVAQALEVIPR  | 20        | 0       |
| 1166.689   | 1166.699   | 0.0098  | 8     | 439.00 |      | 449      | AVAQALEVIPR  |           |         |
| 1185.720   | 1185.7288  | 0.0086  | 7     | 508.00 |      | 518      | TAVETAVLLLR  | 21        | 0       |
| 1185.720   | 1185.7288  | 0.0086  | 7     | 508.00 |      | 518      | TAVETAVLLLR  |           |         |
| 1207.607   | 1207.6157  | 0.0091  | 8     | 182.00 |      | 191      | TVQFEENGRK   |           |         |
| 1419.705   | 1419.7102  | 0.0052  | 4     | 295.00 |      | 306      | GISDLAQHYLMR |           |         |

**MS/MS Fragmentation of TAVETAVLLLR (1185.7288, 1+)**

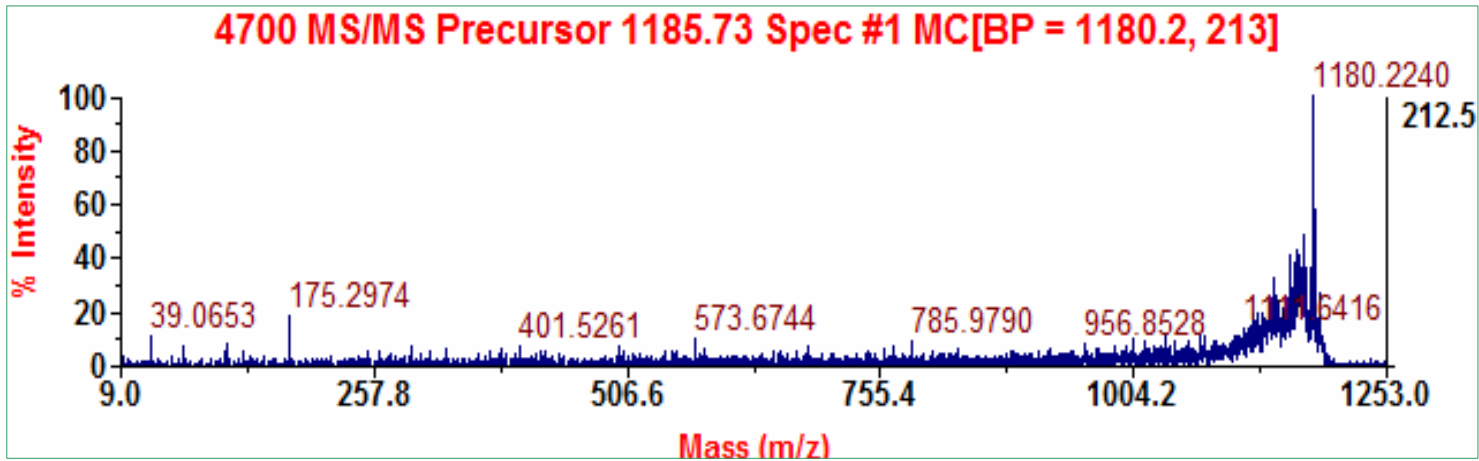

**Spot No.6159**

**gi|159031195**

putative oligoadenylate synthetase 1b [Mus musculus]

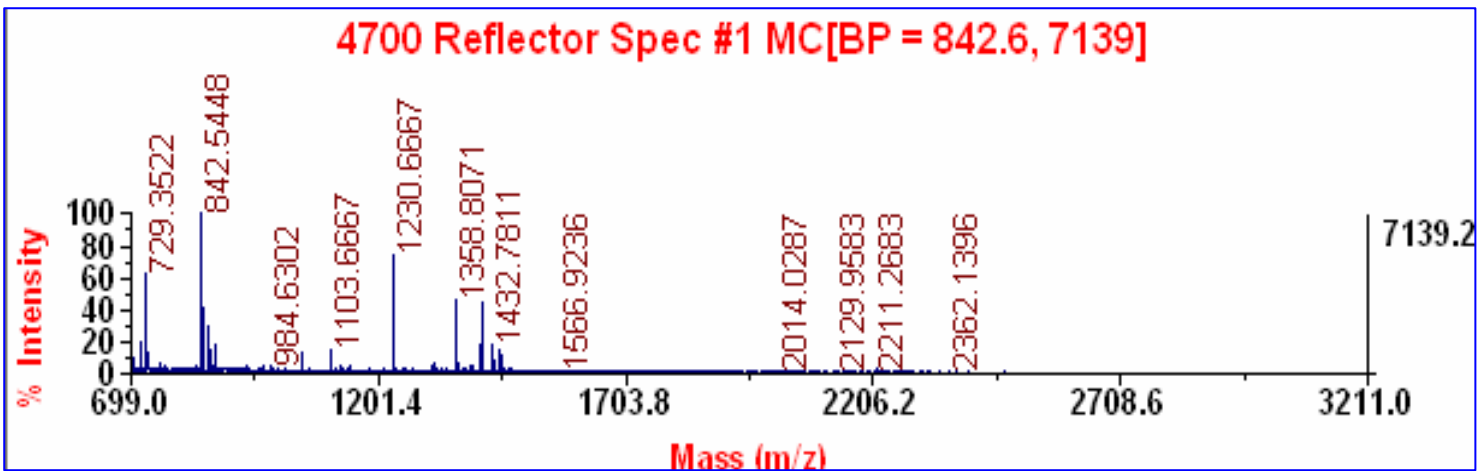

| Calc. Mass | Obsrv.Mass | ± da   | ± ppm | Start Seq. | End Seq. | Sequence  | Ion Score | C. I. % |
|------------|------------|--------|-------|------------|----------|-----------|-----------|---------|
| 833.3821   | 833.4748   | 0.0927 | 111   | 1          | 6        | MEQDLR    |           |         |
| 856.5138   | 856.569    | 0.0552 | 64    | 132        | 139      | LSAPDLLK  |           |         |
| 1141.5823  | 1141.655   | 0.0727 | 64    | 192        | 200      | YFLNCRPTK |           |         |

|           |           |         |     |     |                   |
|-----------|-----------|---------|-----|-----|-------------------|
| 1212.7198 | 1212.6625 | -0.0573 | -47 | 132 | 142 LSAPDLLKEVK   |
| 1268.6746 | 1268.6616 | -0.013  | -10 | 243 | 253 VTKFNQAQGR    |
| 1311.6587 | 1311.7391 | 0.0804  | 61  | 101 | 110 QLCEIQHERR    |
| 1311.6587 | 1311.7391 | 0.0804  | 61  | 101 | 110 QLCEIQHERR    |
| 1358.6079 | 1358.8055 | 0.1976  | 145 | 179 | 190 EGELSTCFMGLR  |
| 1358.6079 | 1358.8055 | 0.1976  | 145 | 179 | 190 EGELSTCFMGLR  |
| 1432.7101 | 1432.7805 | 0.0704  | 49  | 1   | 12 MEQDLRSIPASK   |
| 1448.822  | 1448.7627 | -0.0593 | -41 | 291 | 303 VRPVILDPADPTR |
| 1458.7985 | 1458.8243 | 0.0258  | 18  | 32  | 44 EVIDALCALLKDR  |
| 1470.7079 | 1470.7495 | 0.0416  | 28  | 179 | 191 EGELSTCFMGLRK |

Spot No.6237

gi|6755198

proteasome alpha 6 subunit [Mus musculus]

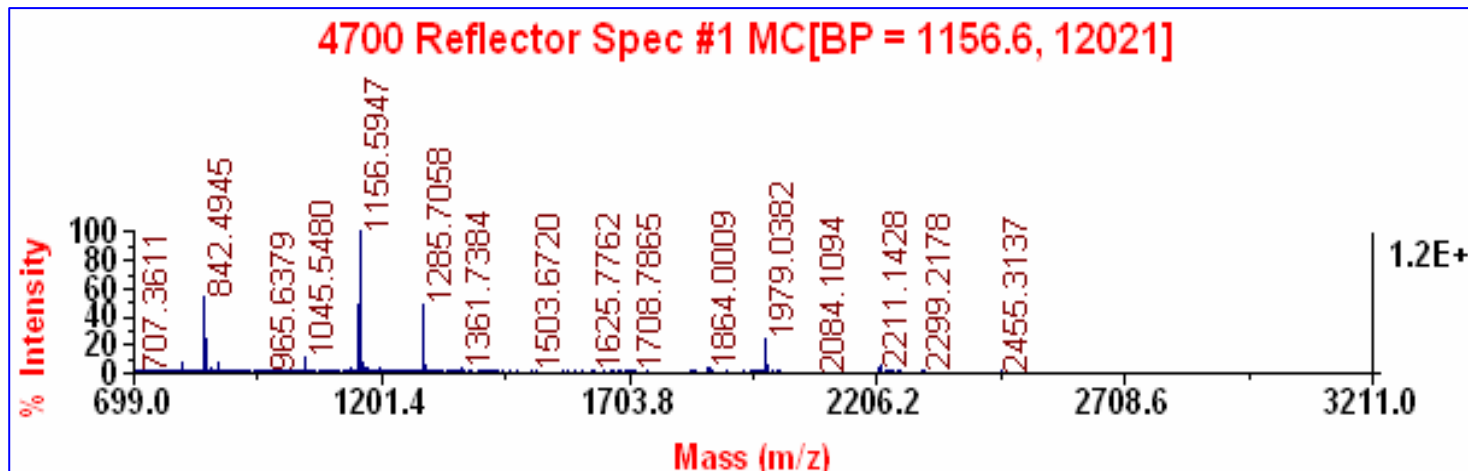

| Calc. Mass       | Obsrv.Mass       | ± da           | ± ppm      | Start     | Seq.      | End Seq.             | Sequence  | Ion Score     | C. I. % |
|------------------|------------------|----------------|------------|-----------|-----------|----------------------|-----------|---------------|---------|
| 796.3583         | 796.3398         | -0.0185        | -23        | 4         | 11        | GSSAGFDR             |           |               |         |
| 1108.5535        | 1108.5613        | 0.0078         | 7          | 94        | 102       | ARYEAAWVK            |           |               |         |
| <b>1156.611</b>  | <b>1156.5944</b> | <b>-0.0166</b> | <b>-14</b> | <b>12</b> | <b>21</b> | <b>HITIFSPEGR</b>    | <b>47</b> | <b>99.528</b> |         |
| 1156.611         | 1156.5944        | -0.0166        | -14        | 12        | 21        | HITIFSPEGR           |           |               |         |
| 1160.5986        | 1160.5873        | -0.0113        | -10        | 22        | 30        | LYQVEYAFK            |           |               |         |
| 1172.5735        | 1172.5925        | 0.019          | 16         | 96        | 104       | YEAANWKYK            |           |               |         |
| <b>1285.7223</b> | <b>1285.7036</b> | <b>-0.0187</b> | <b>-15</b> | <b>31</b> | <b>43</b> | <b>AINQGGLTSVAVR</b> | <b>68</b> | <b>99.996</b> |         |
| 1285.7223        | 1285.7036        | -0.0187        | -15        | 31        | 43        | AINQGGLTSVAVR        |           |               |         |

|           |           |         |     |     |                        |    |        |
|-----------|-----------|---------|-----|-----|------------------------|----|--------|
| 1360.7471 | 1360.7335 | -0.0136 | -10 | 60  | 71 LLDSSTVTHLFK        | 11 | 0      |
| 1360.7471 | 1360.7335 | -0.0136 | -10 | 60  | 71 LLDSSTVTHLFK        |    |        |
| 1864.0175 | 1863.9991 | -0.0184 | -10 | 229 | 245 ILTEAEID AHLVLAER  | 13 | 0      |
| 1864.0175 | 1863.9991 | -0.0184 | -10 | 229 | 245 ILTEAEID AHLVLAER  |    |        |
| 1979.0444 | 1979.0386 | -0.0058 | -3  | 229 | 246 ILTEAEID AHLVLAERD | 72 | 99.999 |
| 1979.0444 | 1979.0386 | -0.0058 | -3  | 229 | 246 ILTEAEID AHLVLAERD |    |        |

MS/MS Fragmentation of **HITIFSPEGR (1156.5944, 1+)**

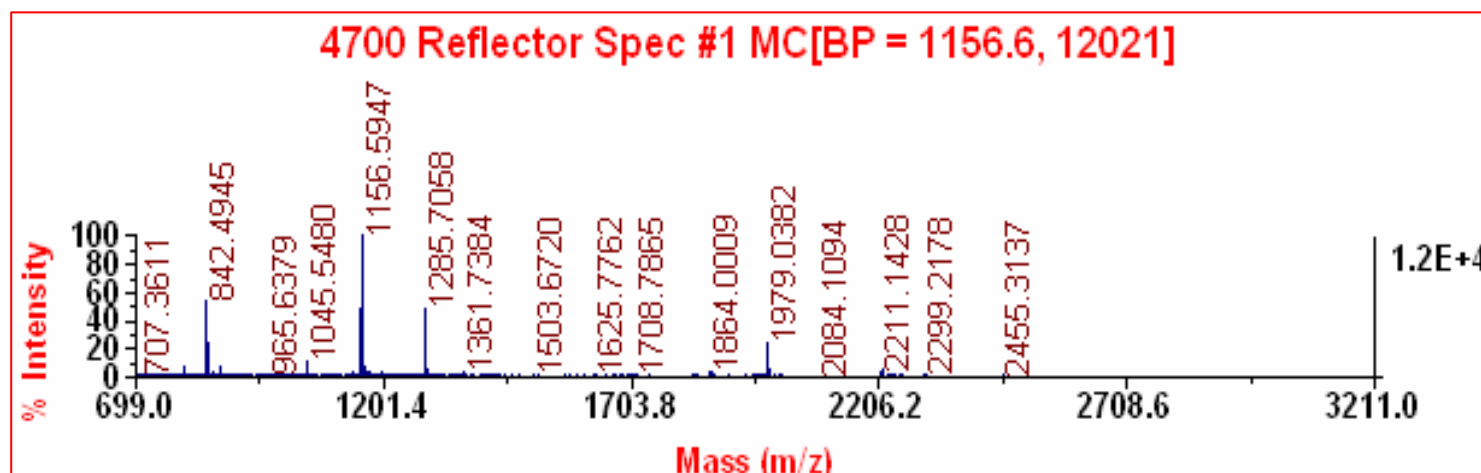

MS/MS Fragmentation of **AINQGGLTSVAVR (1285.7036, 1+)**

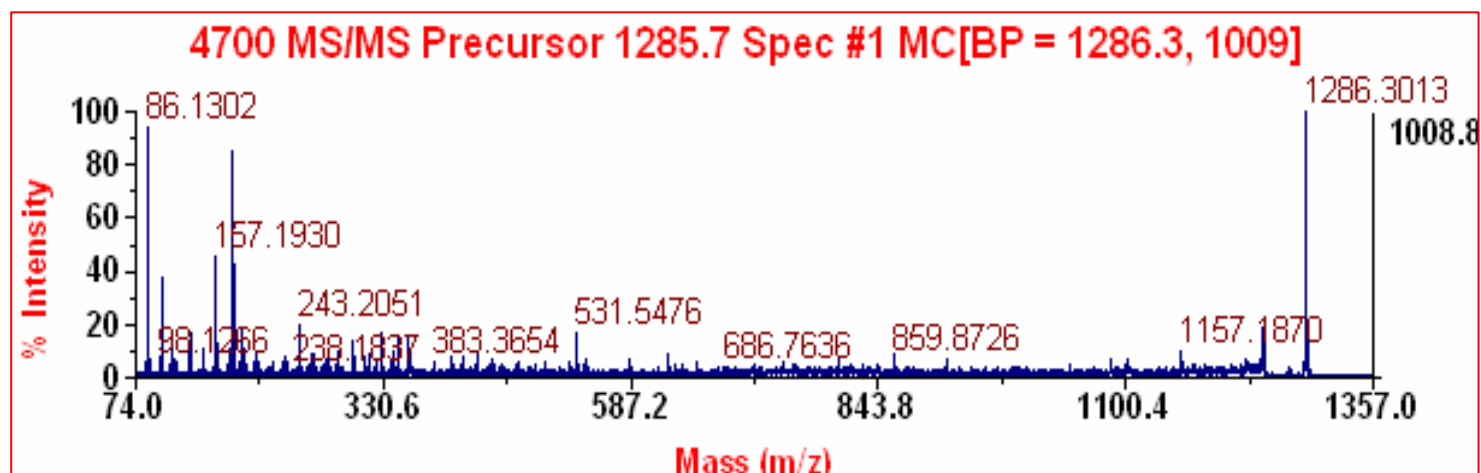

**MS/MS Fragmentation of ILTEAEIDAHLVALAERD (1979.0386, 1+)**

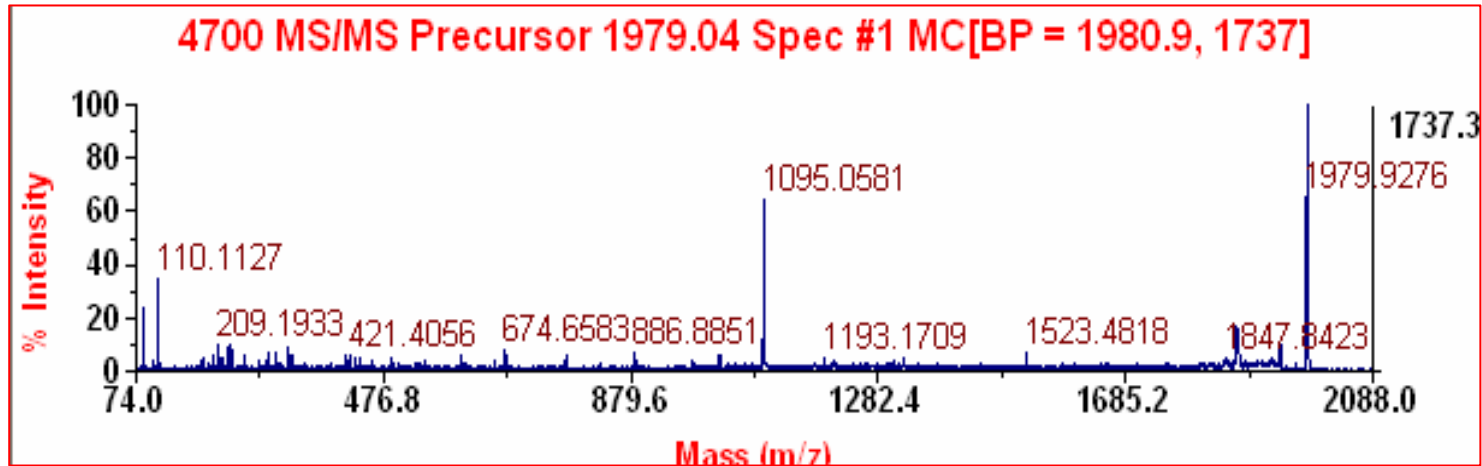

**Spot No.4518**

**gi|14149756**

eukaryotic translation initiation factor 2, subunit 2 (beta) [Mus musculus]

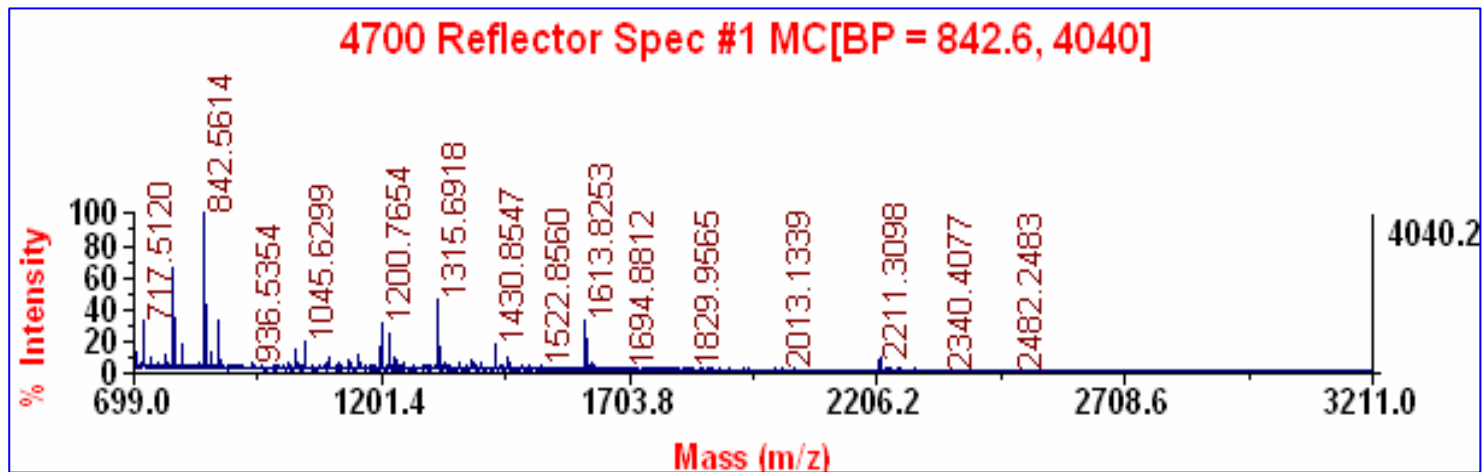

| Calc. Mass | Obsrv. Mass | ± da   | ± ppm | Start | Seq. | End | Seq. | Sequence | Ion Score | C. I. % |
|------------|-------------|--------|-------|-------|------|-----|------|----------|-----------|---------|
| 763.4209   | 763.471     | 0.0501 | 66    | 258   | 263  |     |      | GRFQQK   |           |         |

|           |           |        |     |     |                  |    |       |
|-----------|-----------|--------|-----|-----|------------------|----|-------|
| 779.4232  | 779.4687  | 0.0455 | 58  | 181 | 186 VFNIMR       |    |       |
| 795.4181  | 795.4642  | 0.0461 | 58  | 181 | 186 VFNIMR       |    |       |
| 871.4995  | 871.5662  | 0.0667 | 77  | 264 | 270 QIENVLR      |    |       |
| 1027.6007 | 1027.6696 | 0.0689 | 67  | 264 | 271 QIENVLRR     |    |       |
| 1116.5466 | 1116.6945 | 0.1479 | 132 | 189 | 198 NPDMVAGEKR   |    |       |
| 1200.6921 | 1200.7651 | 0.073  | 61  | 200 | 209 FVMKPPQVVR   |    |       |
| 1200.6921 | 1200.7651 | 0.073  | 61  | 200 | 209 FVMKPPQVVR   |    |       |
| 1216.6871 | 1216.7666 | 0.0795 | 65  | 200 | 209 FVMKPPQVVR   | 0  | 0     |
| 1216.6871 | 1216.7666 | 0.0795 | 65  | 200 | 209 FVMKPPQVVR   |    |       |
| 1315.6165 | 1315.691  | 0.0745 | 57  | 171 | 180 DYTEEELLNR   | 28 | 21.73 |
| 1315.6165 | 1315.691  | 0.0745 | 57  | 171 | 180 DYTEEELLNR   |    |       |
| 1328.7871 | 1328.8787 | 0.0916 | 69  | 199 | 209 KFVMKPPQVVR  |    |       |
| 1457.6287 | 1457.8627 | 0.234  | 161 | 2   | 14 SGDEMIFDPTMSK |    |       |
| 1499.677  | 1499.7325 | 0.0555 | 37  | 295 | 306 LYFLQCETCHSR |    |       |

**MS/MS Fragmentation of DYTEEELLNR (1315.691, 1+)**

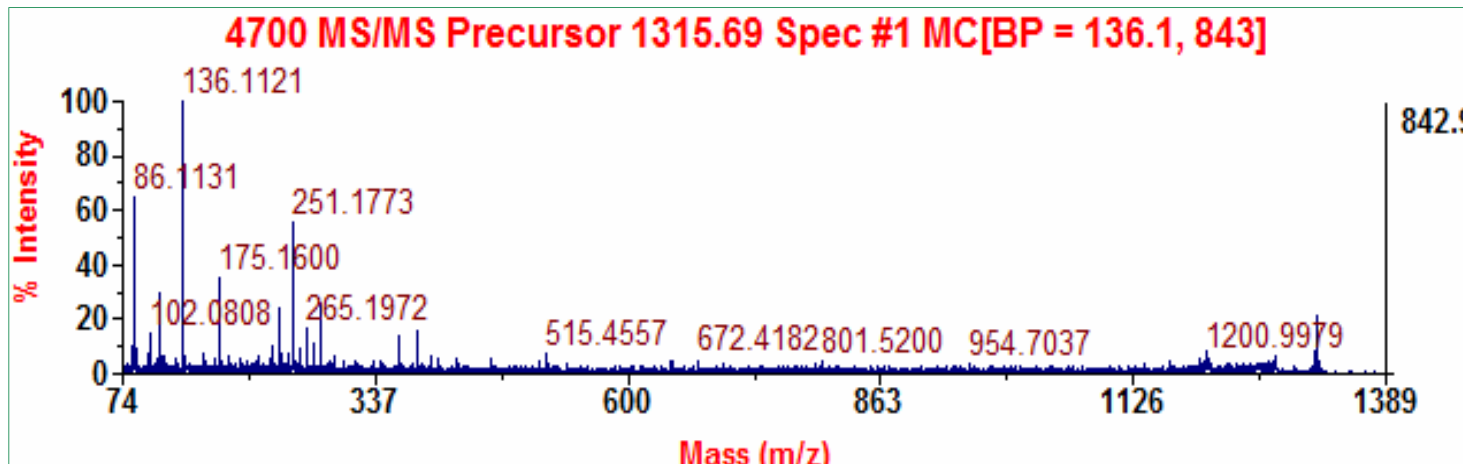

**Spot No.3379**      **gi|6678131**  
spermidine synthase [Mus musculus]

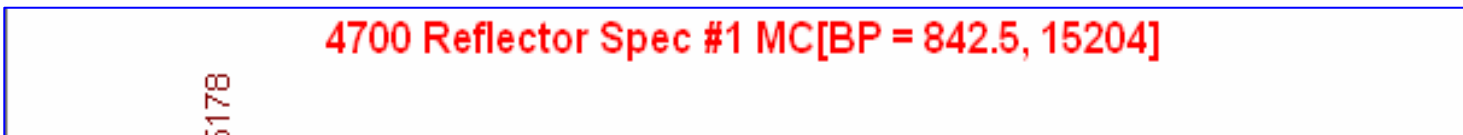



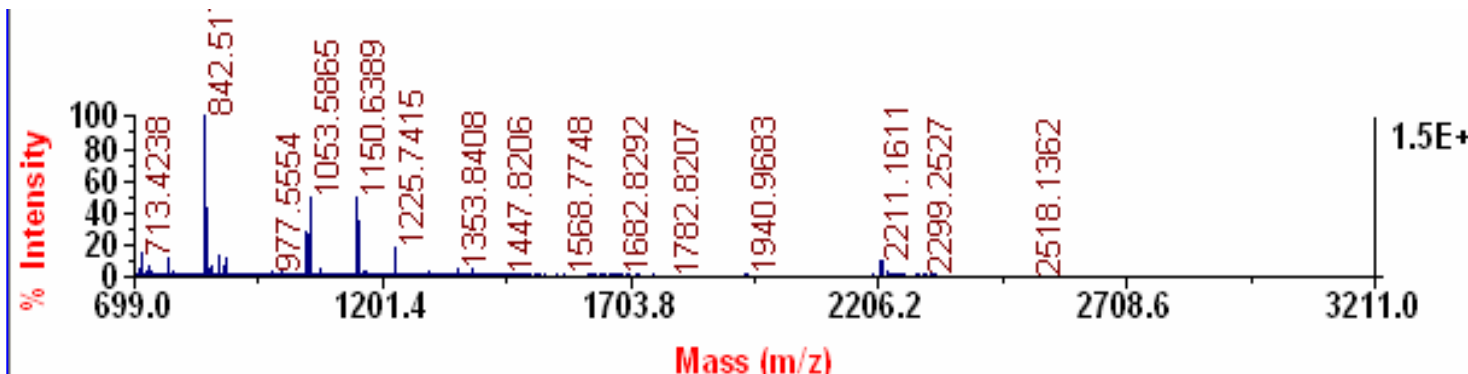

| Calc. Mass | Obsrv. Mass | ± da   | ± ppm | Start | Seq. | End Seq.          | Sequence | Ion Score | C. I. % |
|------------|-------------|--------|-------|-------|------|-------------------|----------|-----------|---------|
| 1053.5728  | 1053.5862   | 0.0134 | 13    | 48    | 55   | YQDILVFR          | 27       | 42.017    |         |
| 1053.5728  | 1053.5862   | 0.0134 | 13    | 48    | 55   | YQDILVFR          |          |           |         |
| 1150.6255  | 1150.6385   | 0.013  | 11    | 286   | 295  | AAFVLPEFTR        | 19       | 0         |         |
| 1150.6255  | 1150.6385   | 0.013  | 11    | 286   | 295  | AAFVLPEFTR        |          |           |         |
| 1225.7262  | 1225.7413   | 0.0151 | 12    | 97    | 109  | VLIIGGGDGGVLR     | 31       | 79.895    |         |
| 1225.7262  | 1225.7413   | 0.0151 | 12    | 97    | 109  | VLIIGGGDGGVLR     |          |           |         |
| 1296.7059  | 1296.7186   | 0.0127 | 10    | 46    | 55   | SRYQDILVFR        |          |           |         |
| 1343.6664  | 1343.7051   | 0.0387 | 29    | 136   | 148  | FLPGMAVGFSSSK     |          |           |         |
| 1353.8212  | 1353.8406   | 0.0194 | 14    | 96    | 109  | KVLIIGGGDGGVLR    | 5        | 0         |         |
| 1353.8212  | 1353.8406   | 0.0194 | 14    | 96    | 109  | KVLIIGGGDGGVLR    |          |           |         |
| 2233.0496  | 2233.1653   | 0.1157 | 52    | 278   | 295  | YNSDMHRAAFVLPEFTR |          |           |         |

### MS/MS Fragmentation of YQDILVFR (1053.5862, 1+)

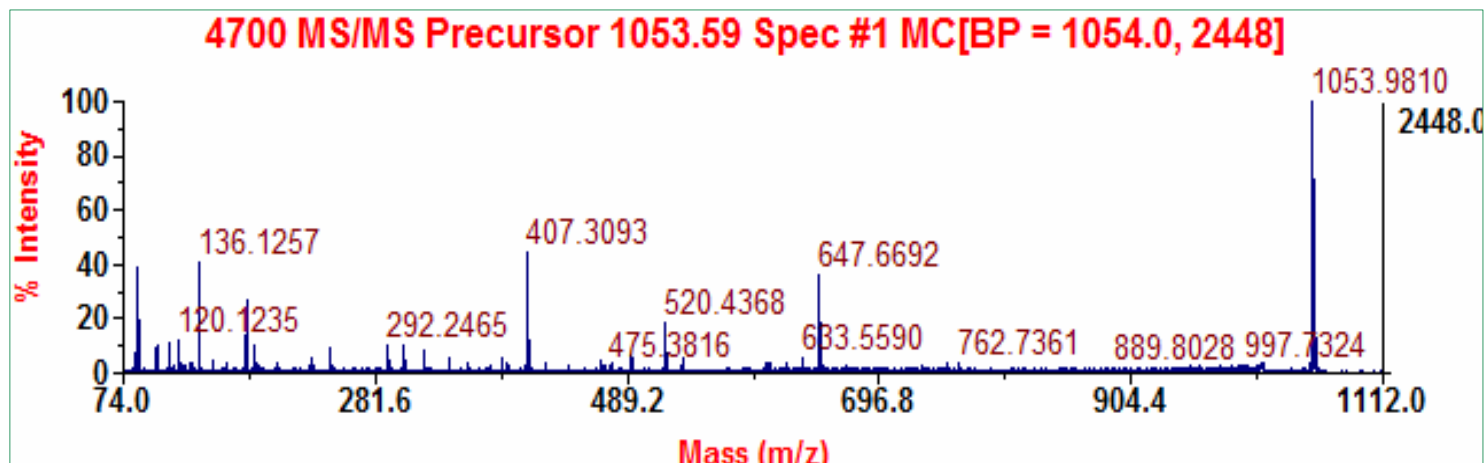

Mass (m/z)

MS/MS Fragmentation of **VLIIGGGDGGVLR** (1225.7413, 1+)

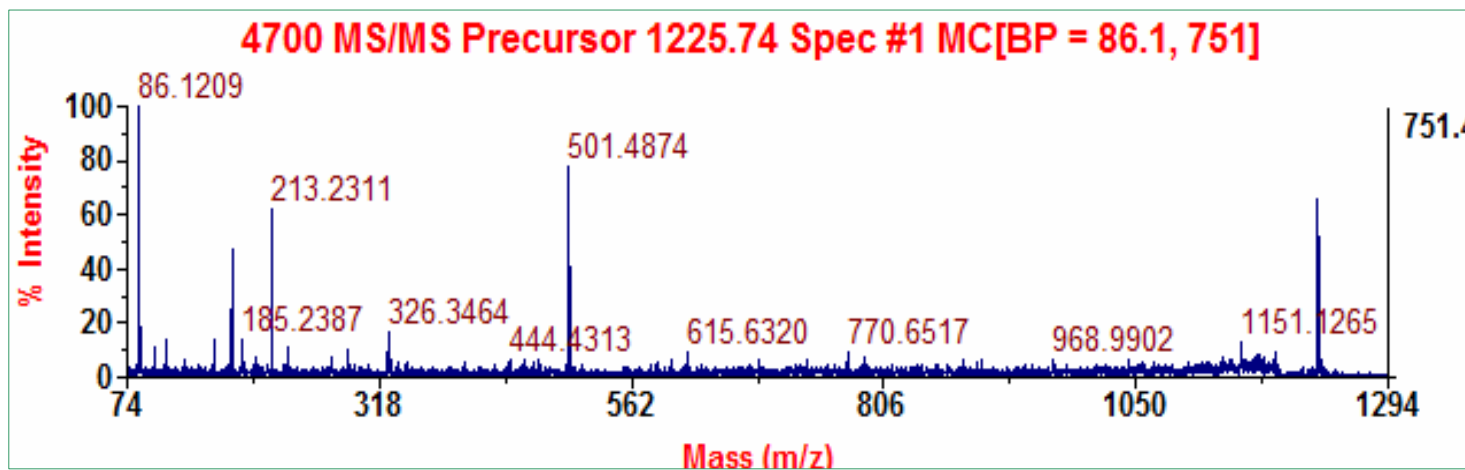

Supplement: JVI.03186-12_zjv999097792so1.pdf [file JVI.03186-12_zjv999097792so1.pdf]
